# Supplementary material for: Synergistic anticancer effect by targeting CDK2 and EGFR–ERK signaling
Source: PubMed Central journal article supplement — J Cell Biol. 2023 Nov 13;223(1):e202203005. doi: 10.1083/jcb.202203005 (PMC10641568; doi:10.1083/jcb.202203005), 2023-11-13

Source Data Figure.2A

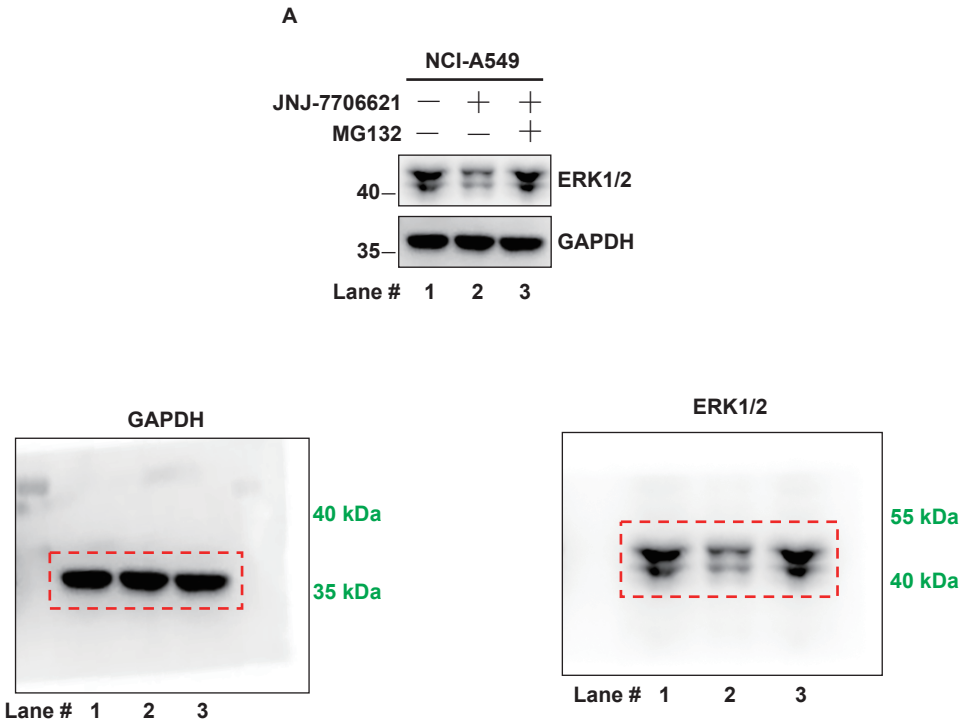

Source Data Figure.2C

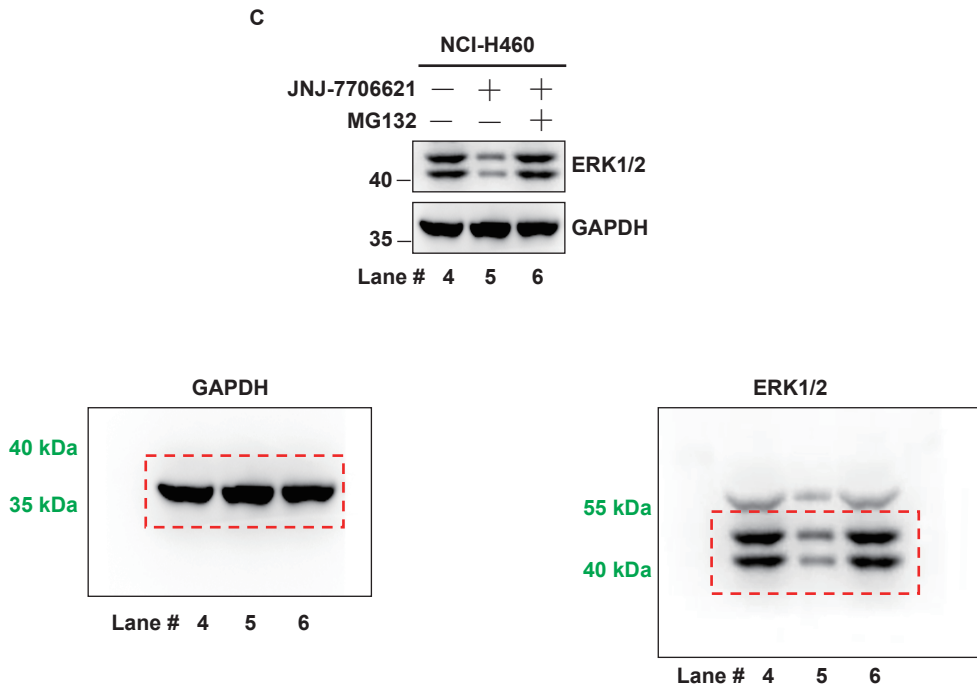

Source Data Figure.2F

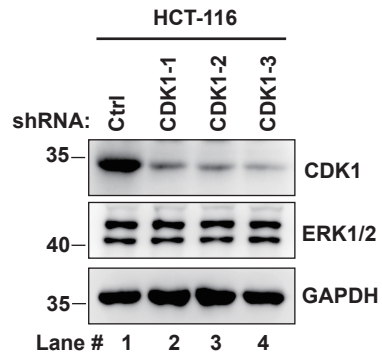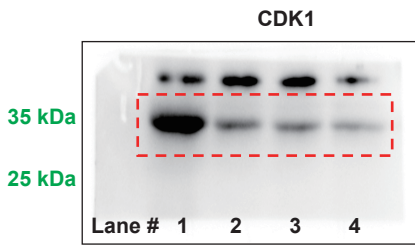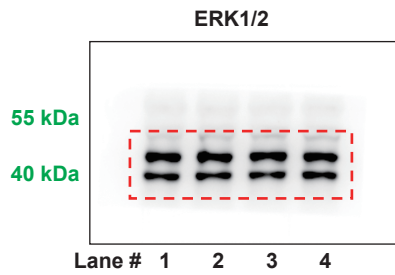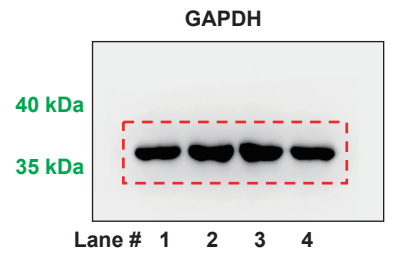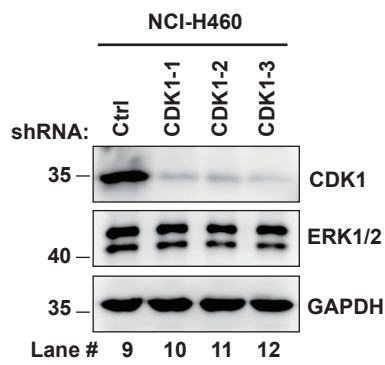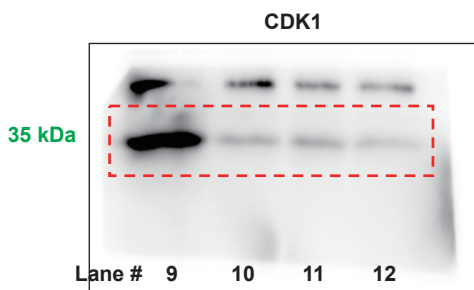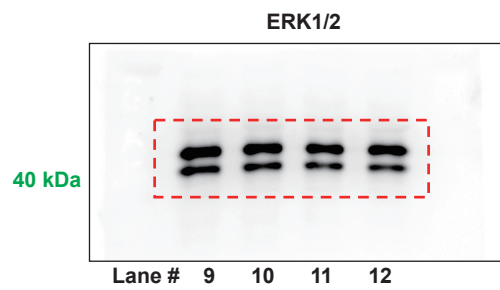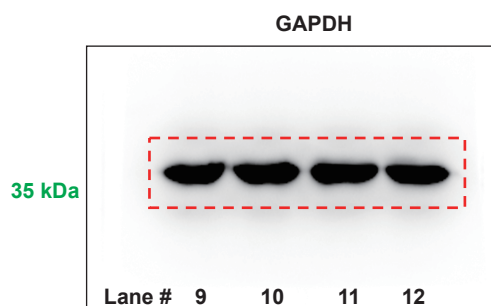

### Source Data Figure.2G

G

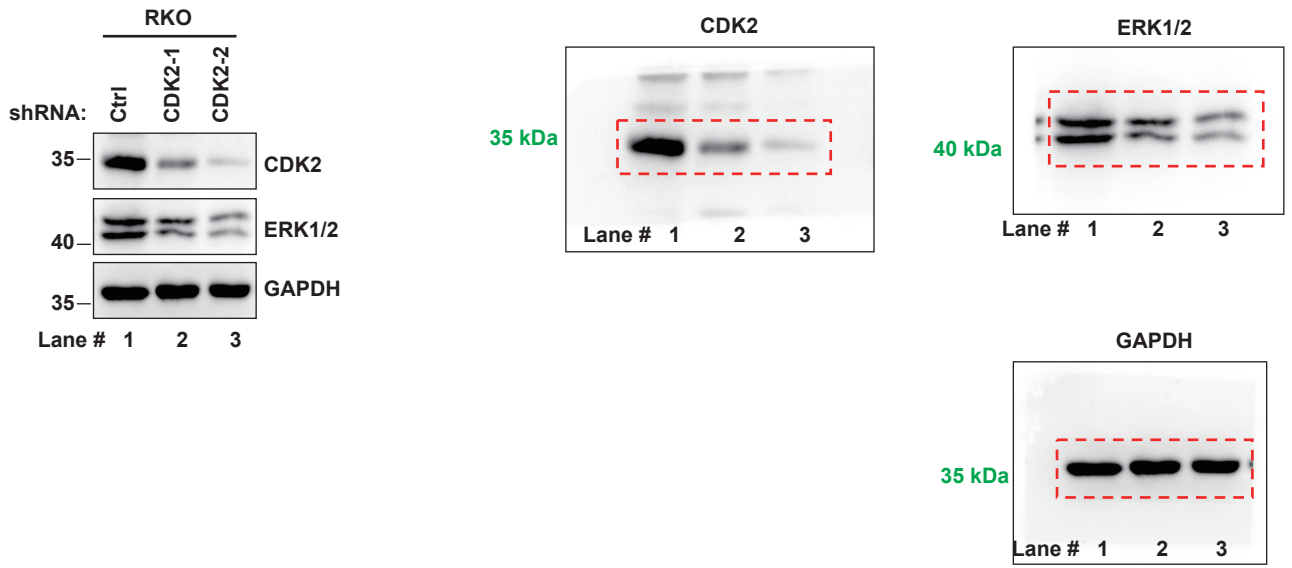

### Source Data Figure.2H

H

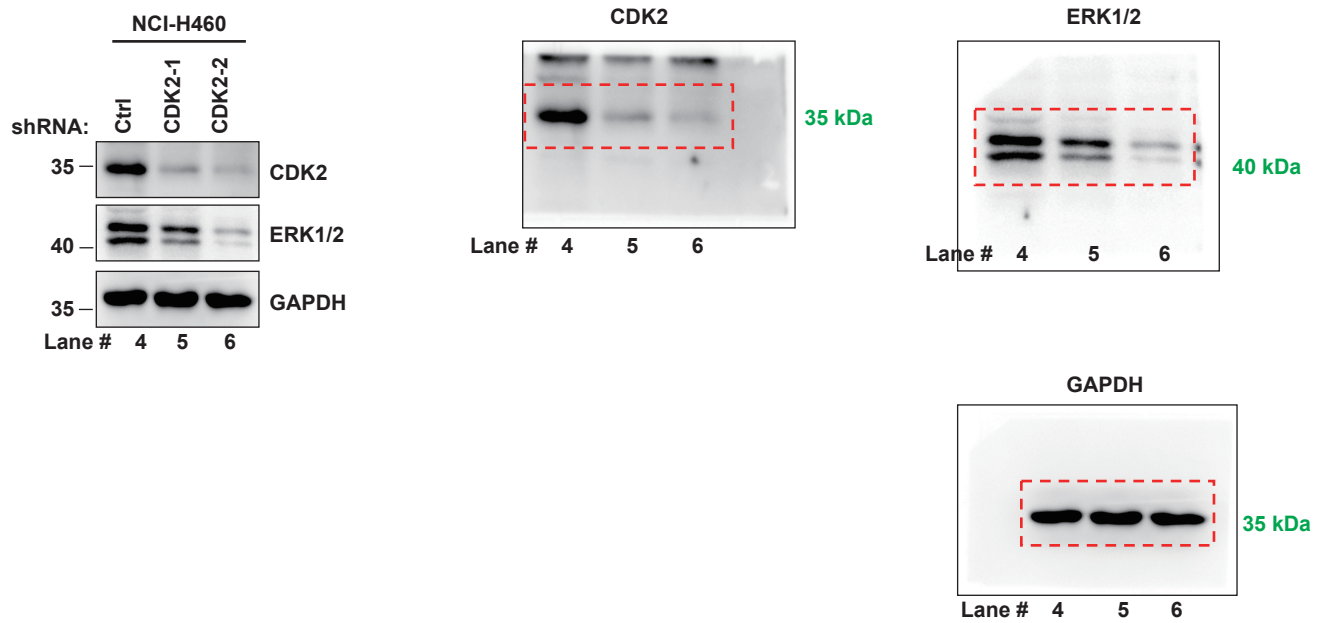

Source Data Figure.2J

J

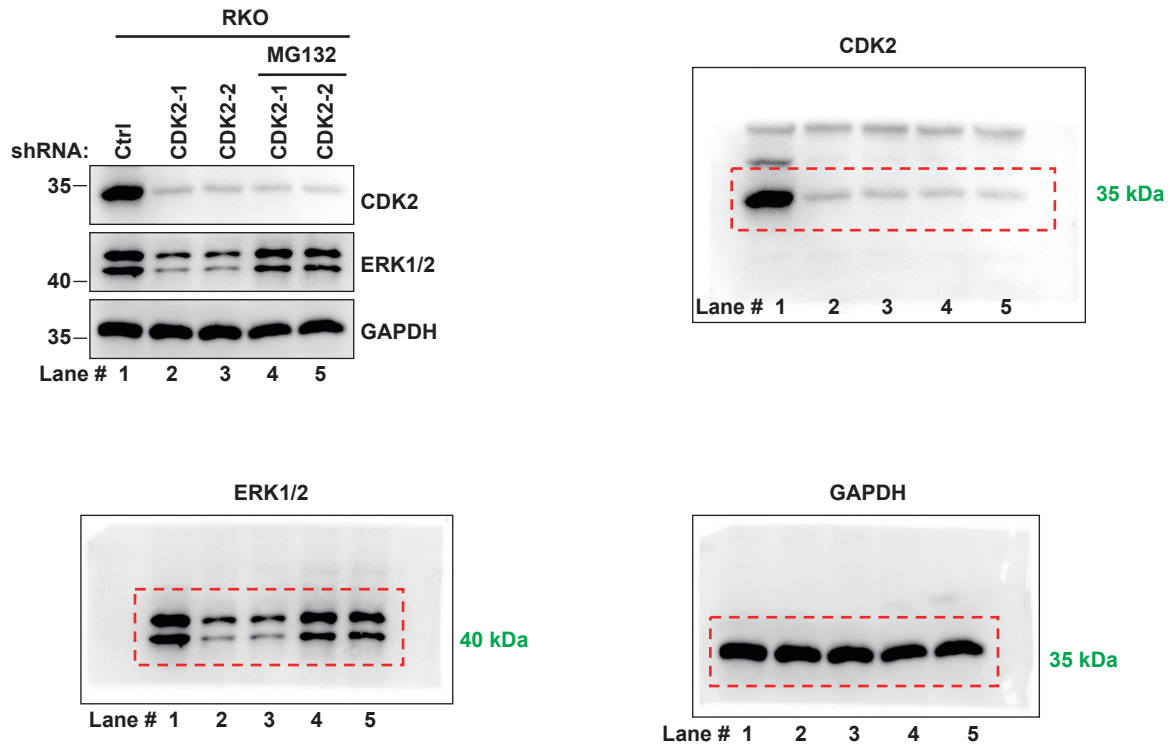

Source Data Figure.2K

K

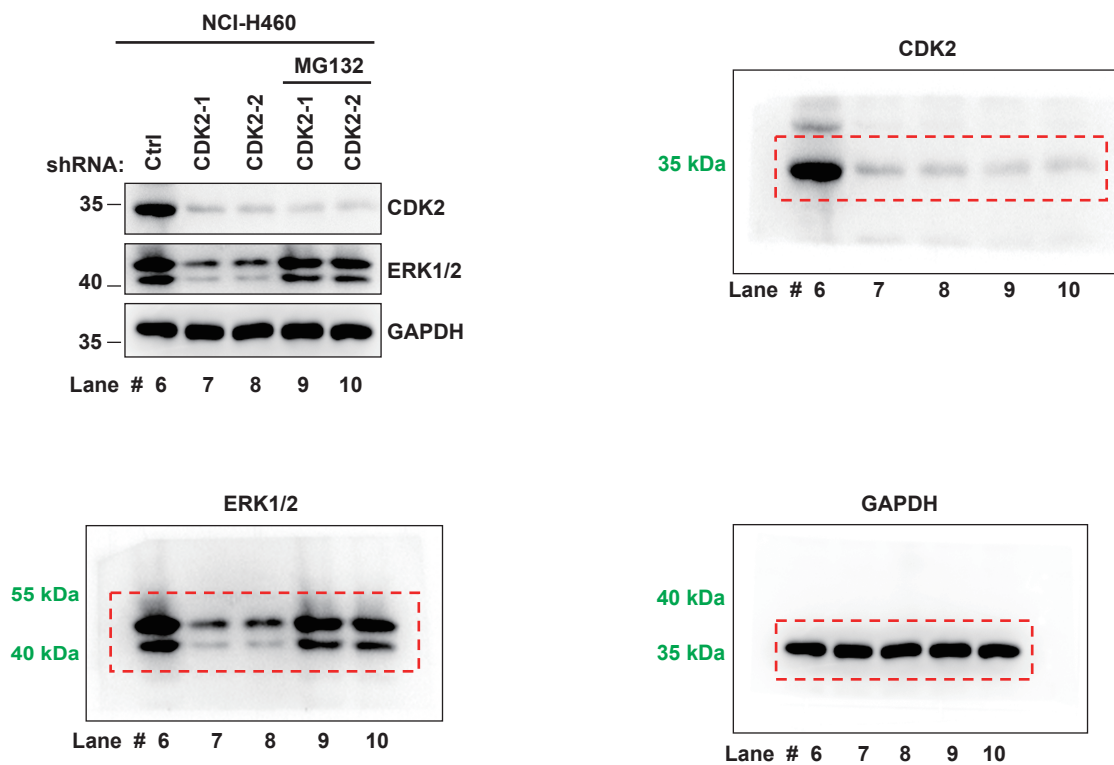

Source Data Figure.2M

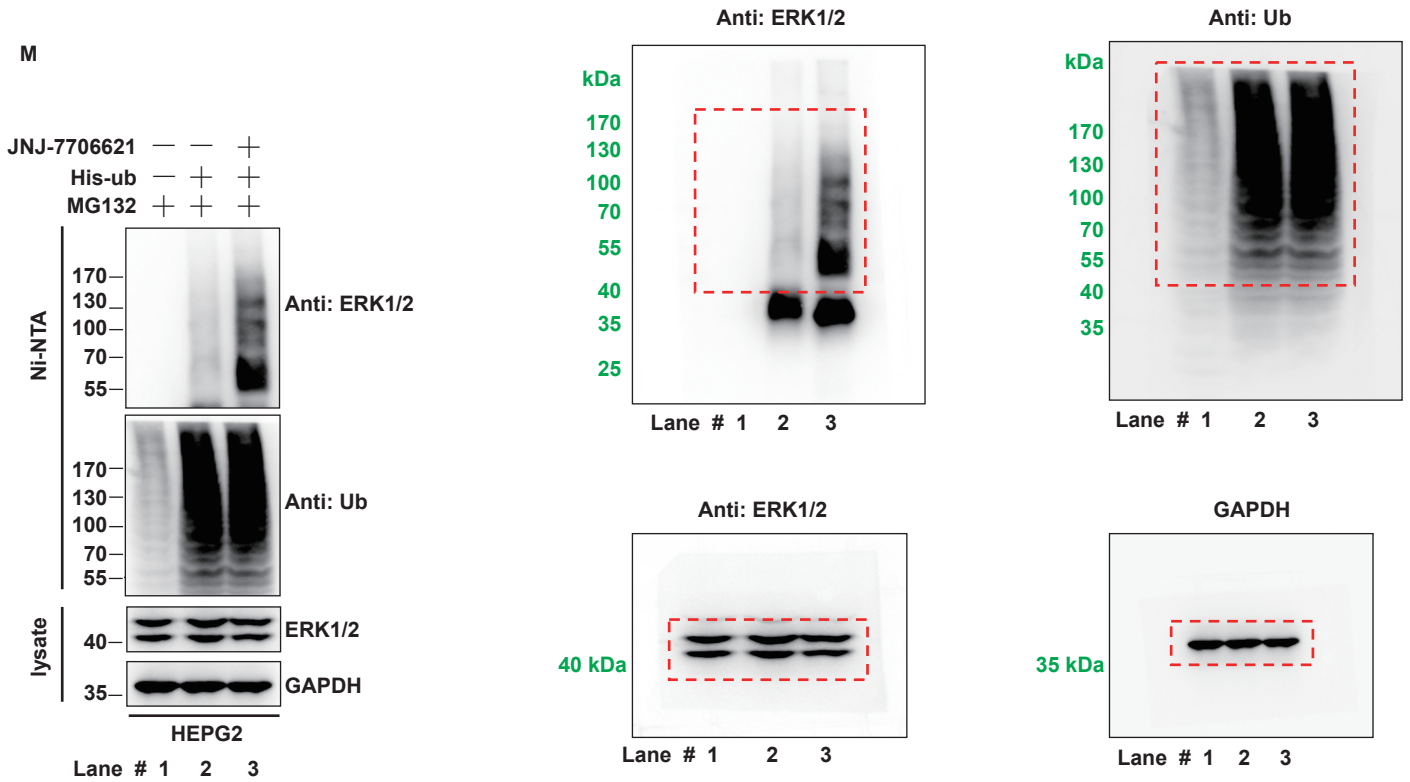

Source Data Figure.2N

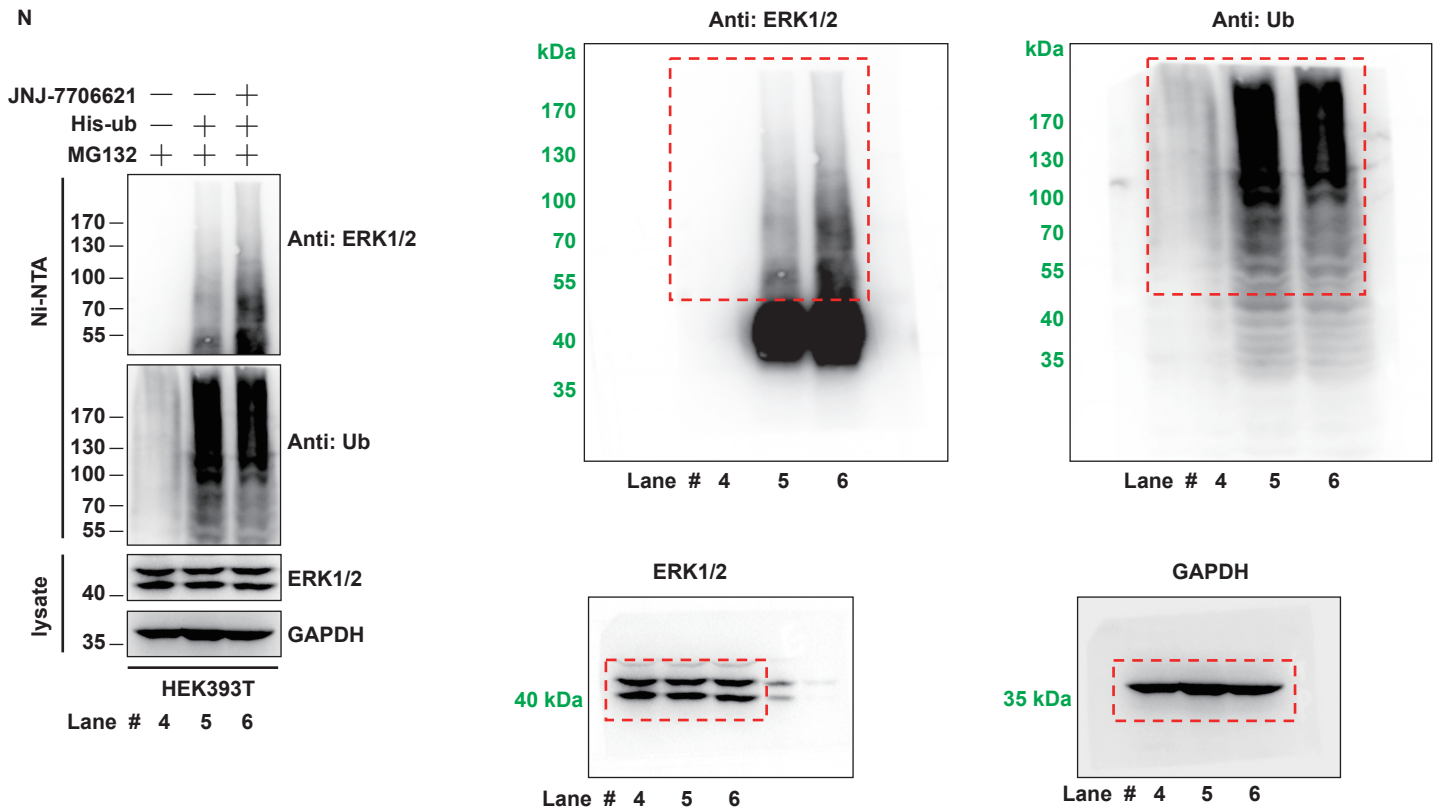

Source Data Figure.20

O

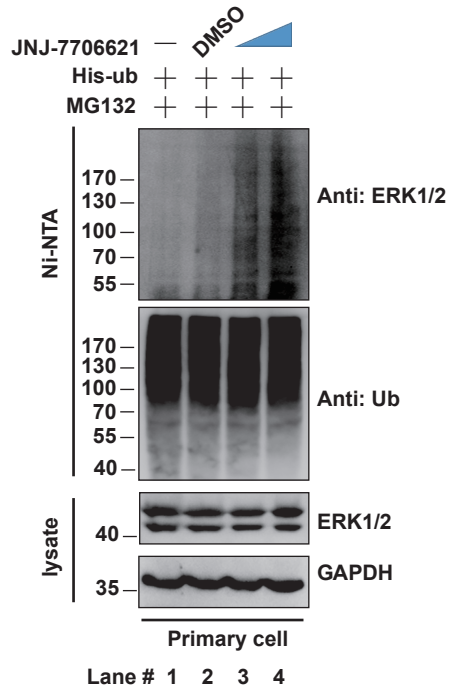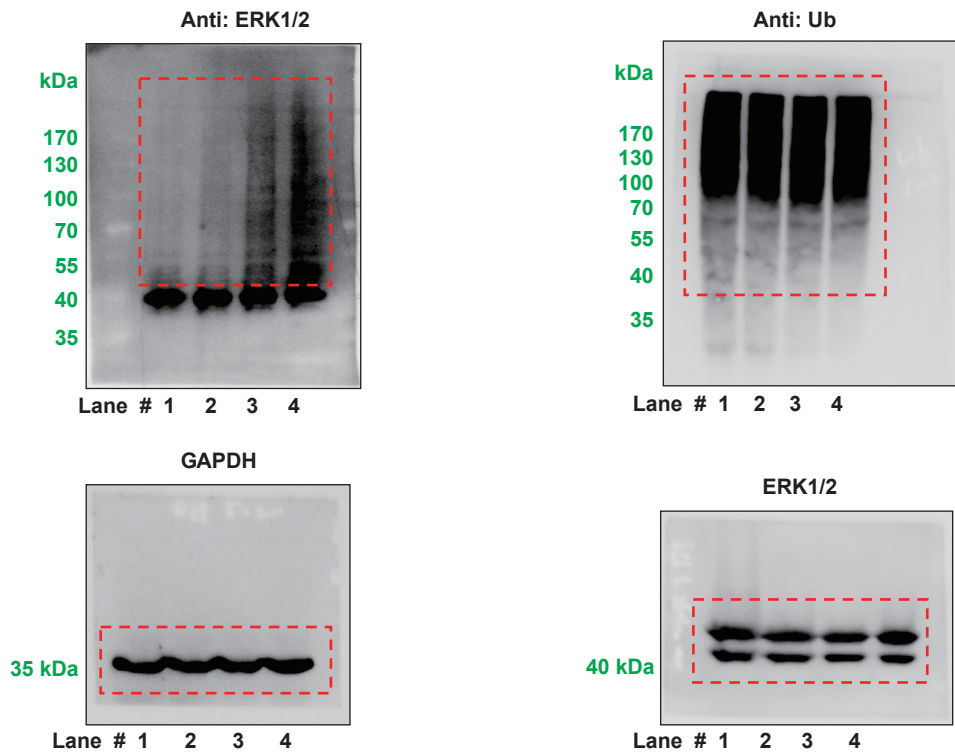

Supplement: JCB_202203005_SourceDataF2.pdf [file JCB_202203005_SourceDataF2.pdf]
