# Supplementary material for: Synergistic anticancer effect by targeting CDK2 and EGFR–ERK signaling
Source: PubMed Central journal article supplement — J Cell Biol. 2023 Nov 13;223(1):e202203005. doi: 10.1083/jcb.202203005 (PMC10641568; doi:10.1083/jcb.202203005), 2023-11-13

### Source Data Figure.4A

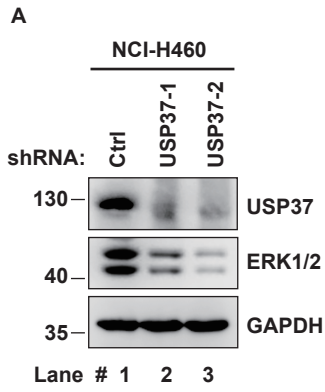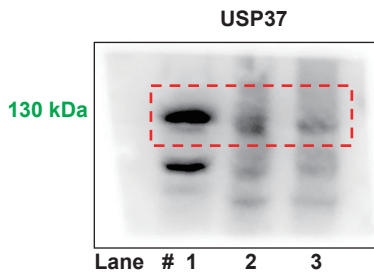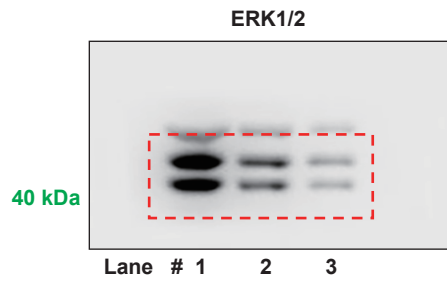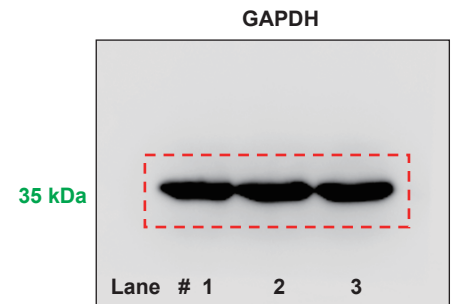

### Source Data Figure.4B

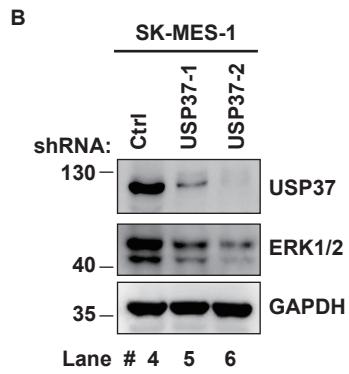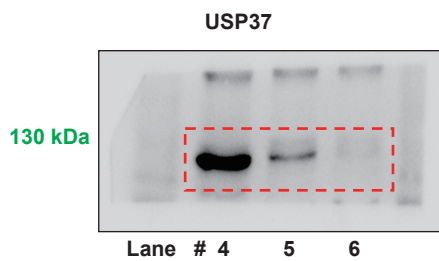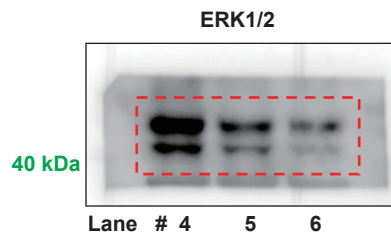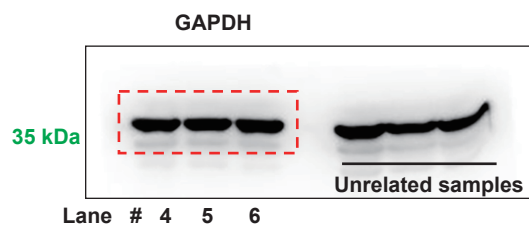

Source Data Figure.4D

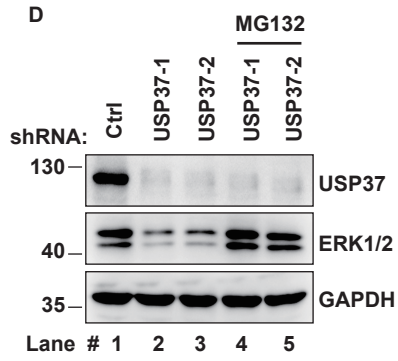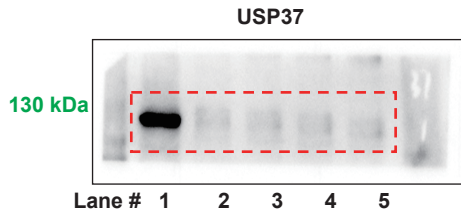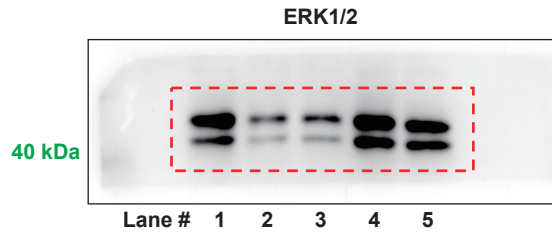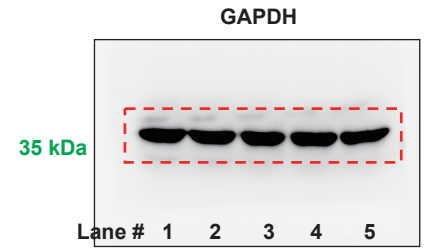

Source Data Figure.4E

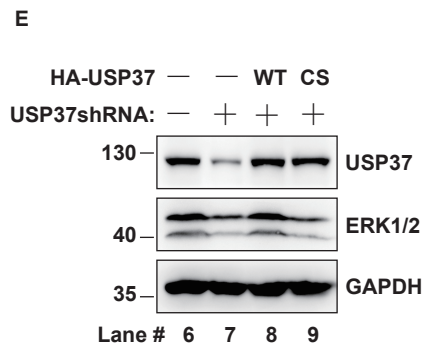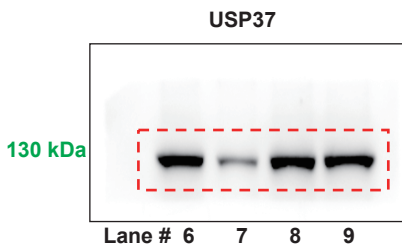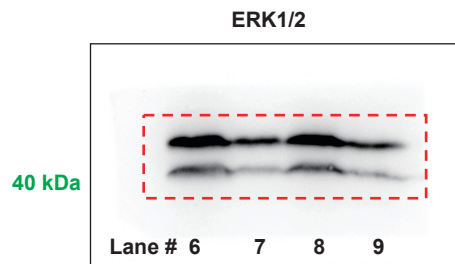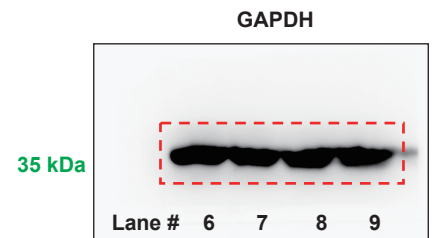

Source Data Figure.4F

F

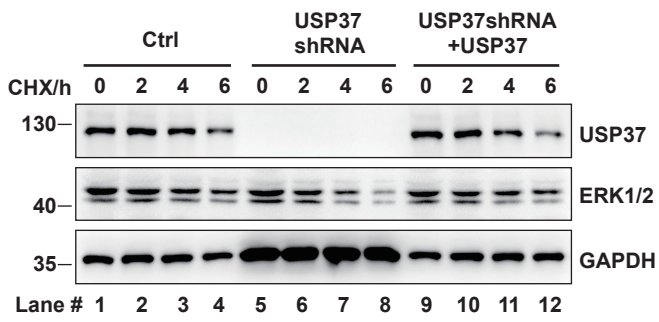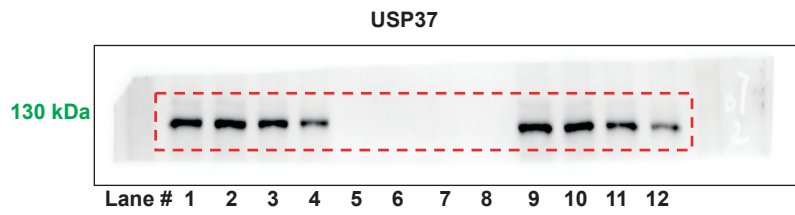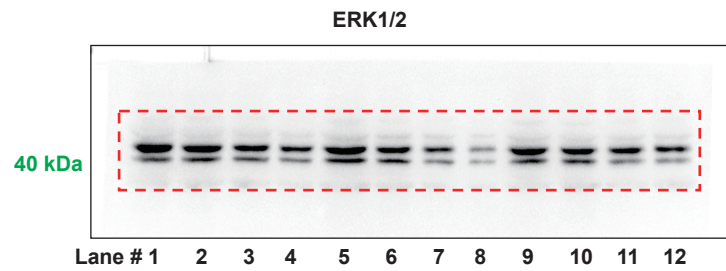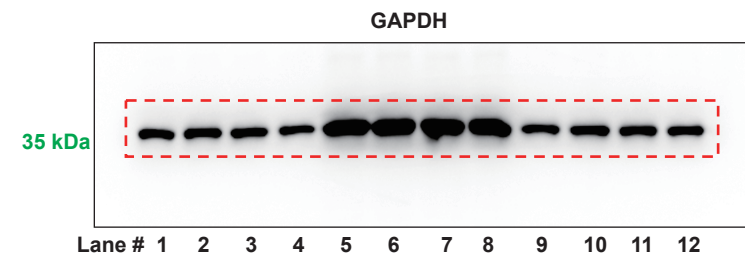

Source Data Figure.4H

H

|                |   |   |   |
|----------------|---|---|---|
| HA-USP37-WT    | - | + | - |
| HA-USP37-C350S | - | - | + |
| His-ub         | + | + | + |
| MG132          | + | + | + |

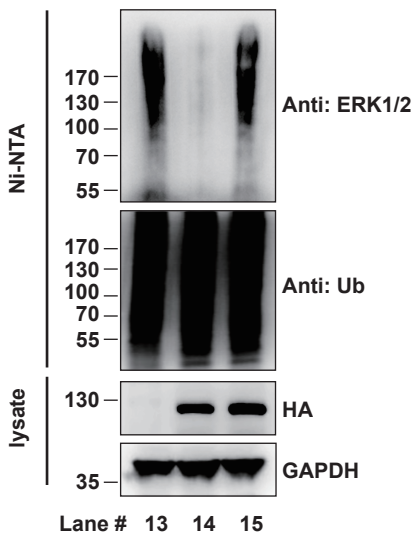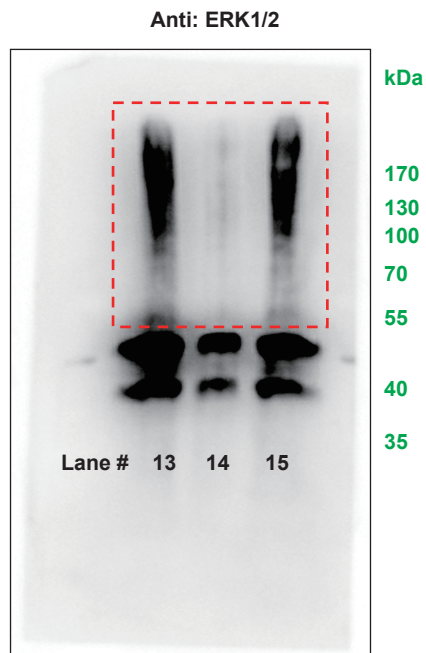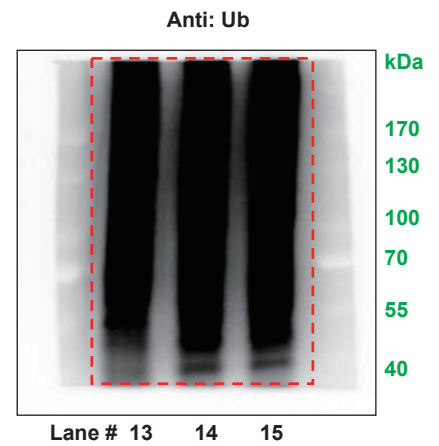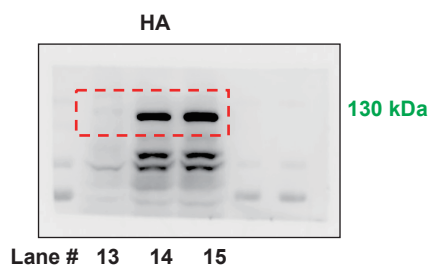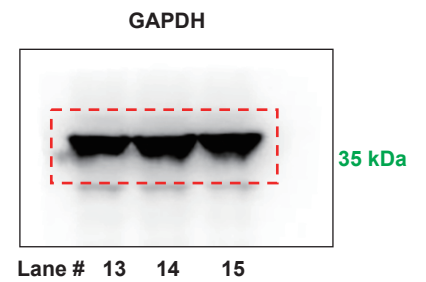

Source Data Figure.4I

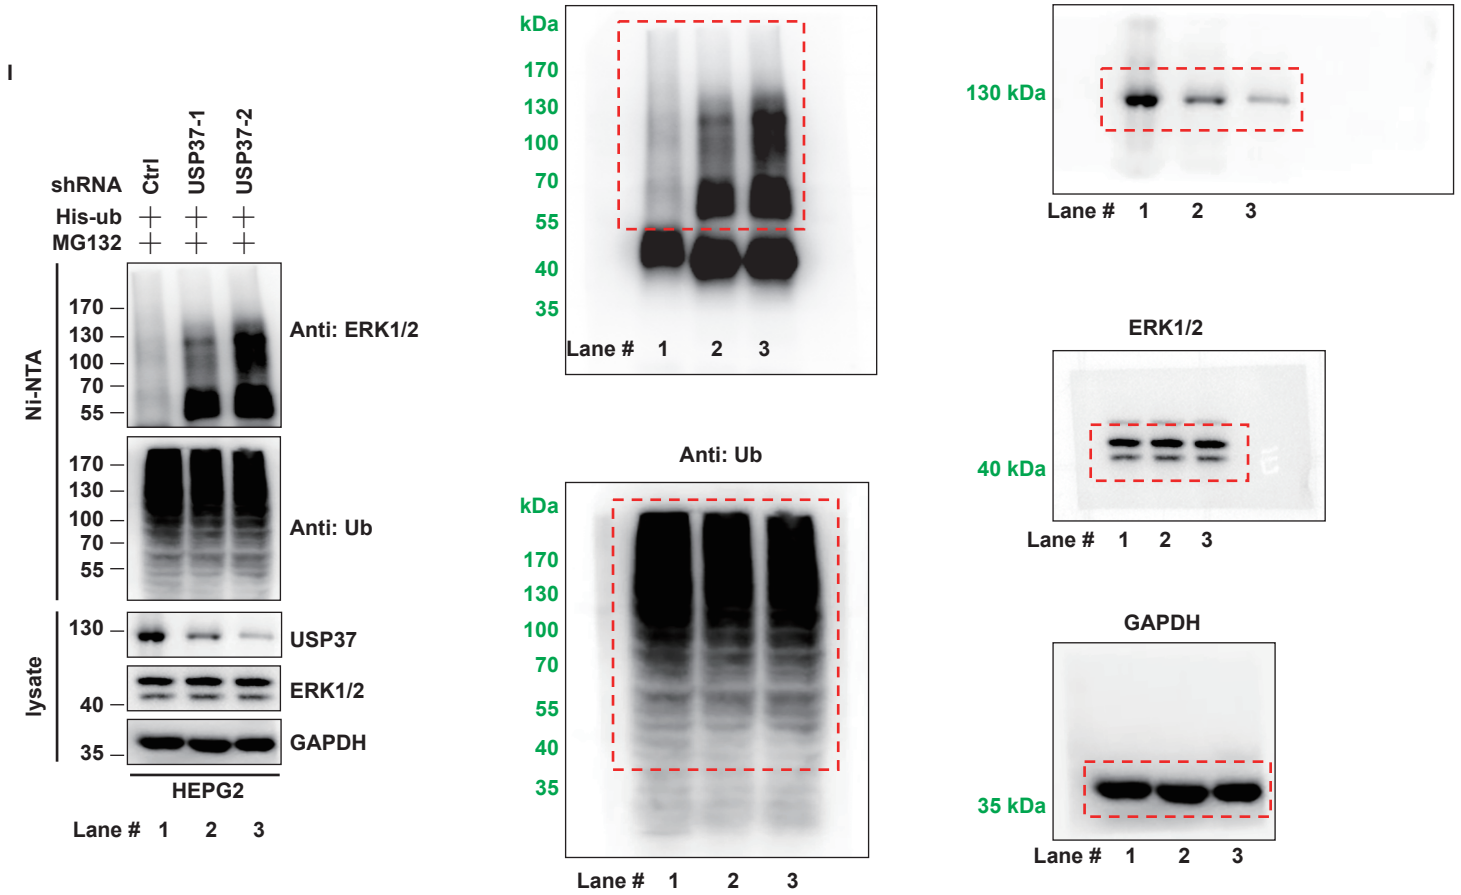

Source Data Figure.4J

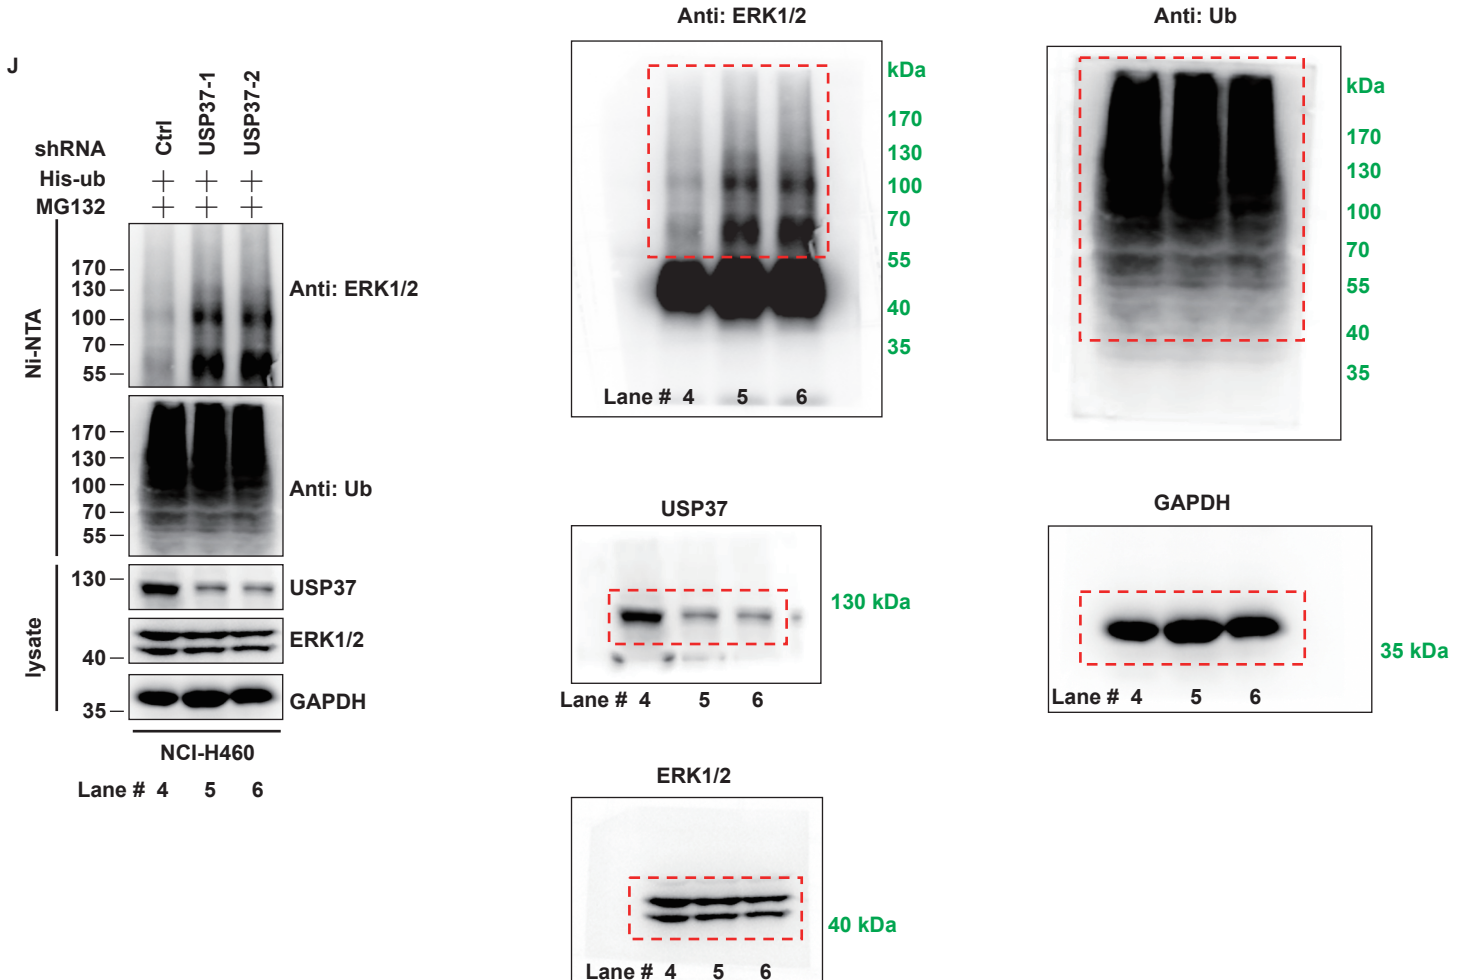

Source Data Figure.4K

K

|                |   |   |   |                                 |
|----------------|---|---|---|---------------------------------|
| HA-ERK1        | + | + | + | IP Ub-ERK1<br>from cell lysates |
| His-Ub         | + | + | + |                                 |
| MG132          | + | + | + |                                 |
| Vector         | + | - | - | Incubated<br>with USP37         |
| HA-USP37-WT    | - | + | - |                                 |
| HA-USP37-C350S | - | - | + |                                 |

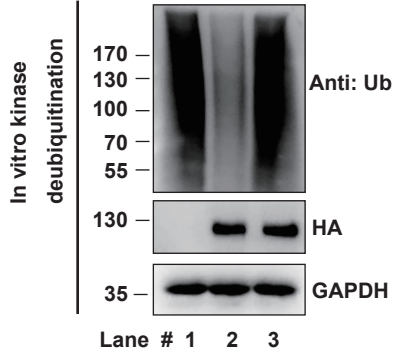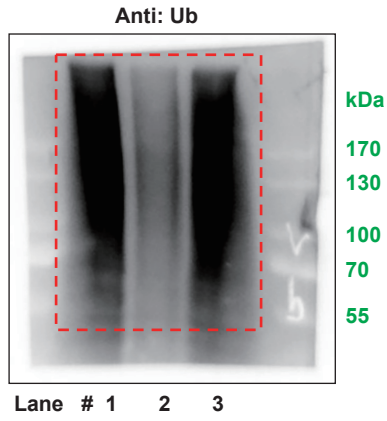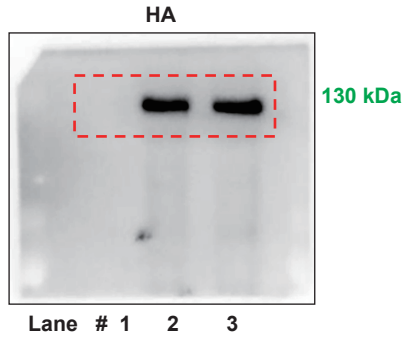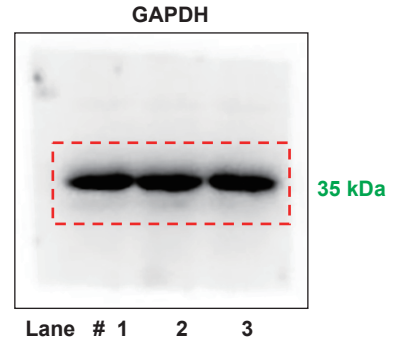

Source Data Figure.4L

L

|                |   |   |   |                                 |
|----------------|---|---|---|---------------------------------|
| HA-ERK2        | + | + | + | IP Ub-ERK2<br>from cell lysates |
| His-Ub         | + | + | + |                                 |
| MG132          | + | + | + |                                 |
| Vector         | + | - | - | Incubated<br>with USP37         |
| HA-USP37-WT    | - | + | - |                                 |
| HA-USP37-C350S | - | - | + |                                 |

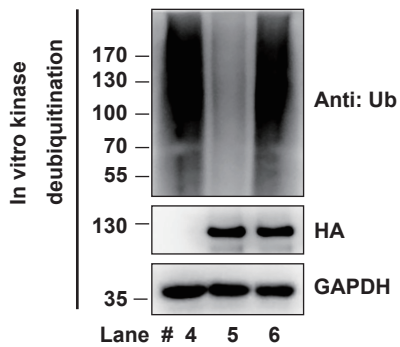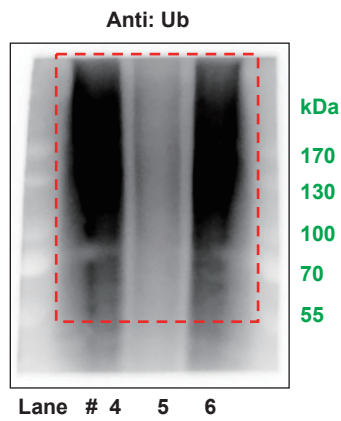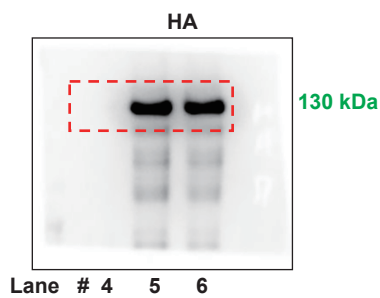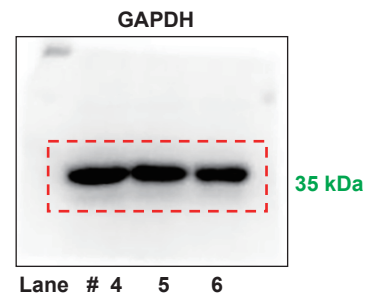

Supplement: JCB_202203005_SourceDataF4.pdf [file JCB_202203005_SourceDataF4.pdf]
