# Supplementary material for: Synergistic anticancer effect by targeting CDK2 and EGFR–ERK signaling
Source: PubMed Central journal article supplement — J Cell Biol. 2023 Nov 13;223(1):e202203005. doi: 10.1083/jcb.202203005 (PMC10641568; doi:10.1083/jcb.202203005), 2023-11-13

Source Data Figure.6A

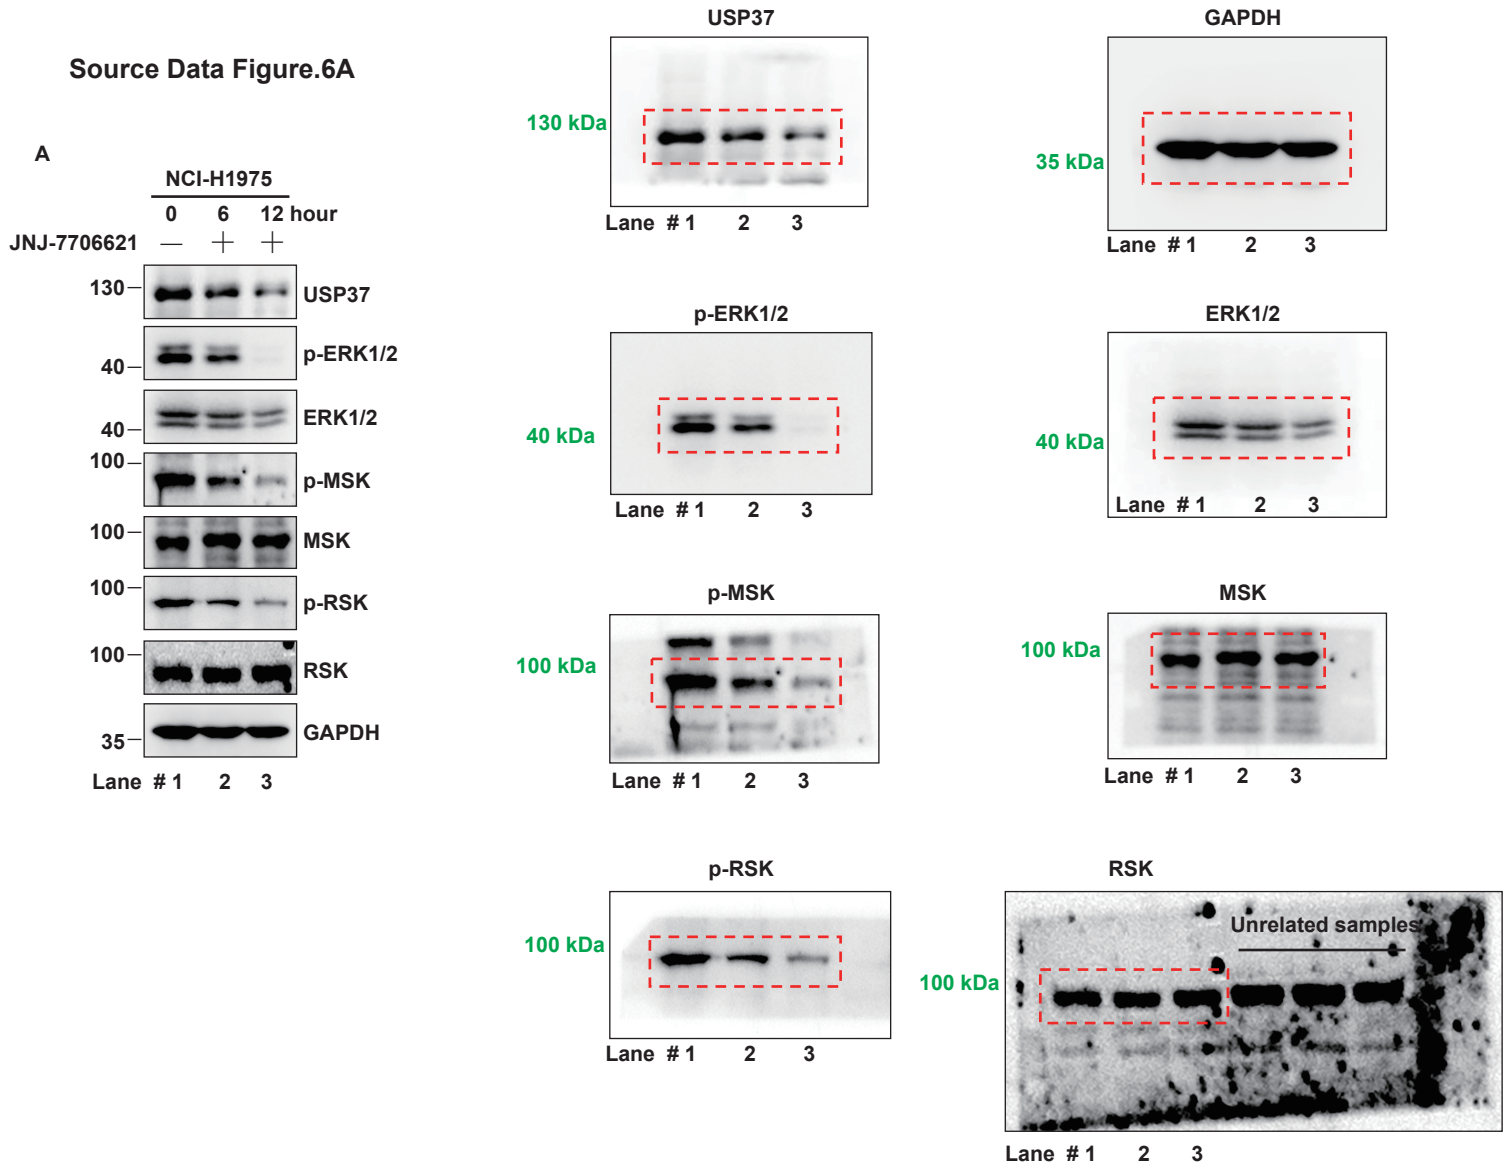

Source Data Figure.6B

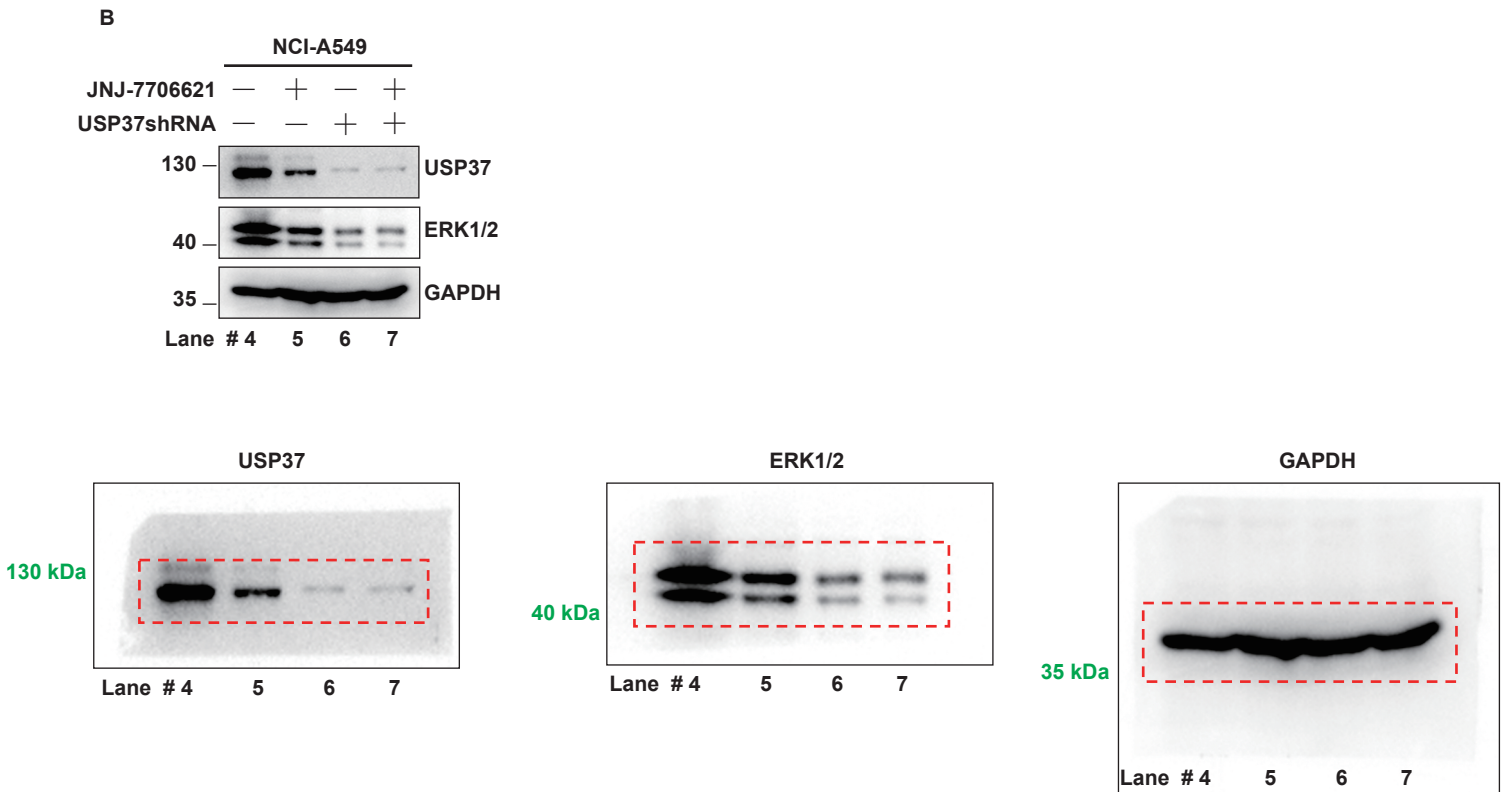

Source Data Figure.6C

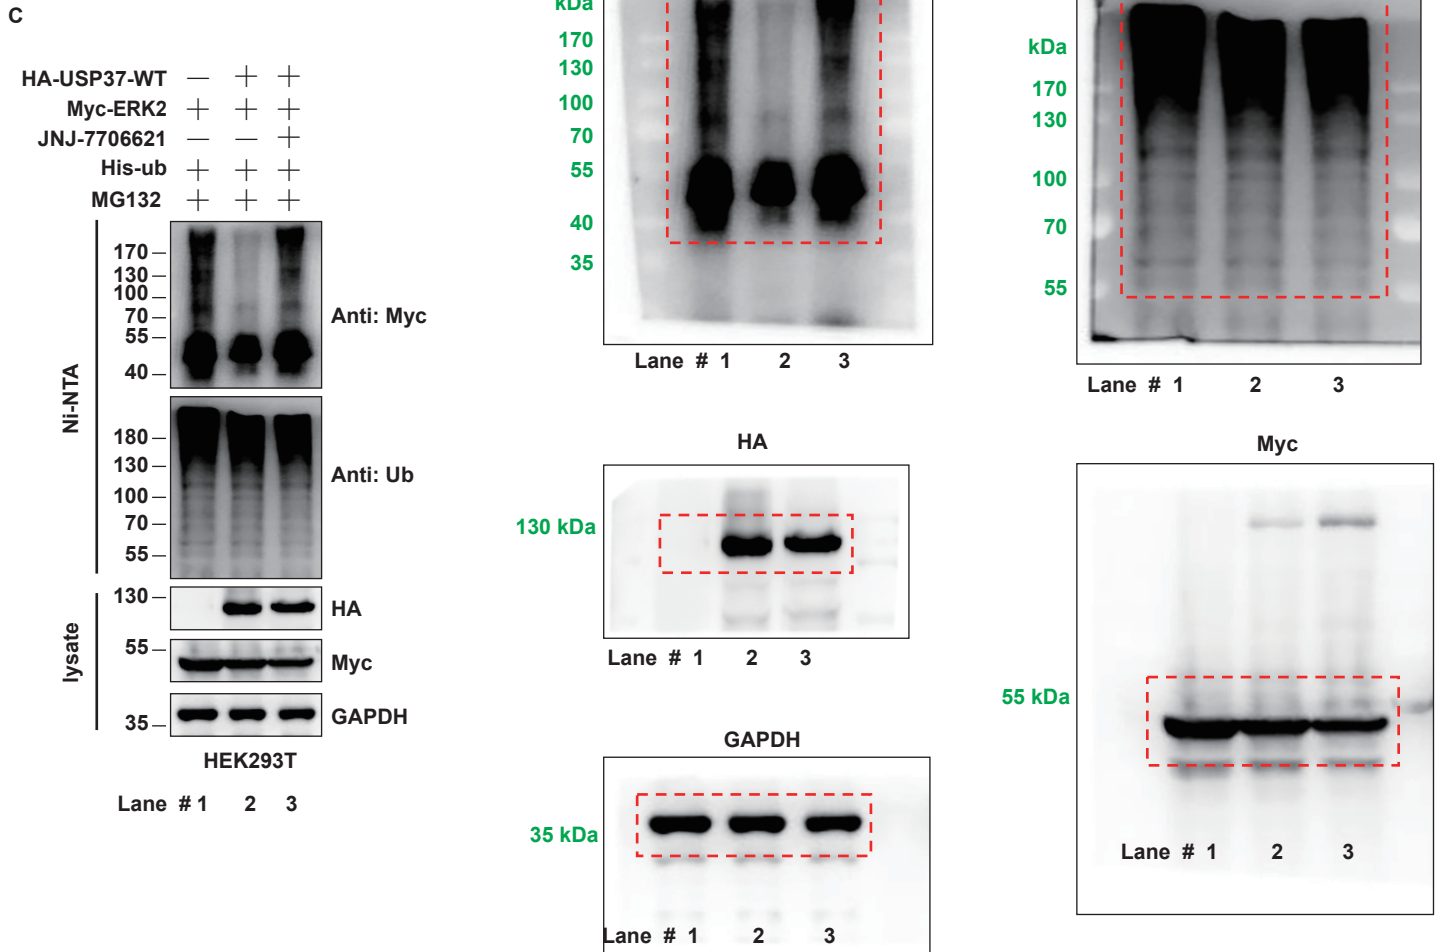

Source Data Figure.6D

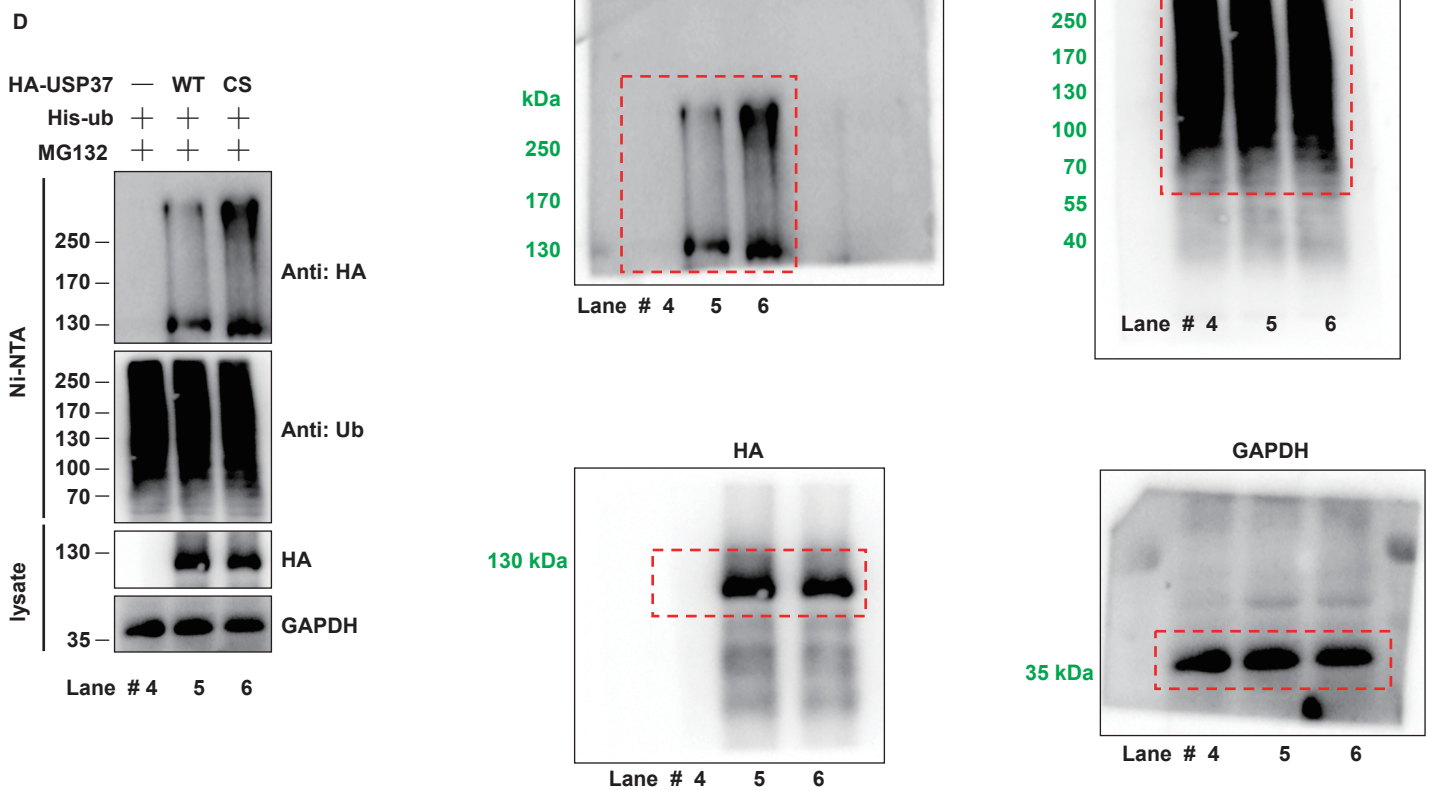

Source Data Figure.6E

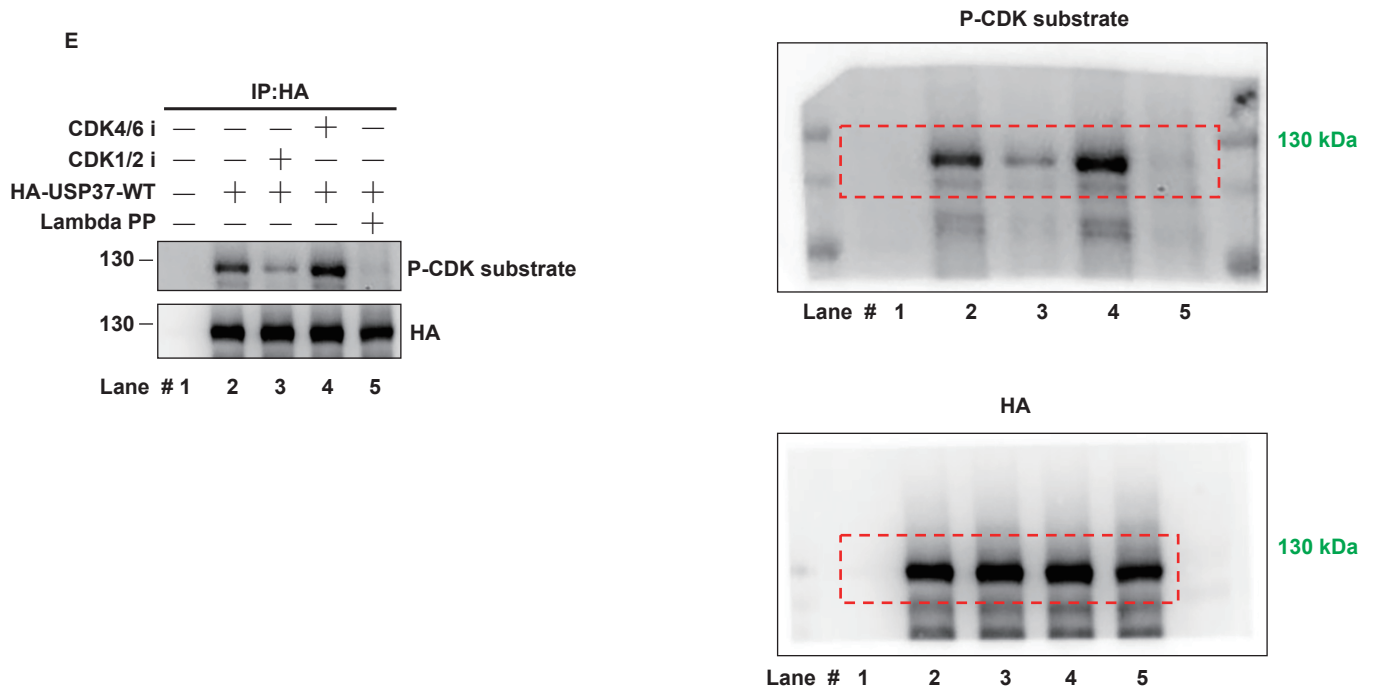

Source Data Figure.6F

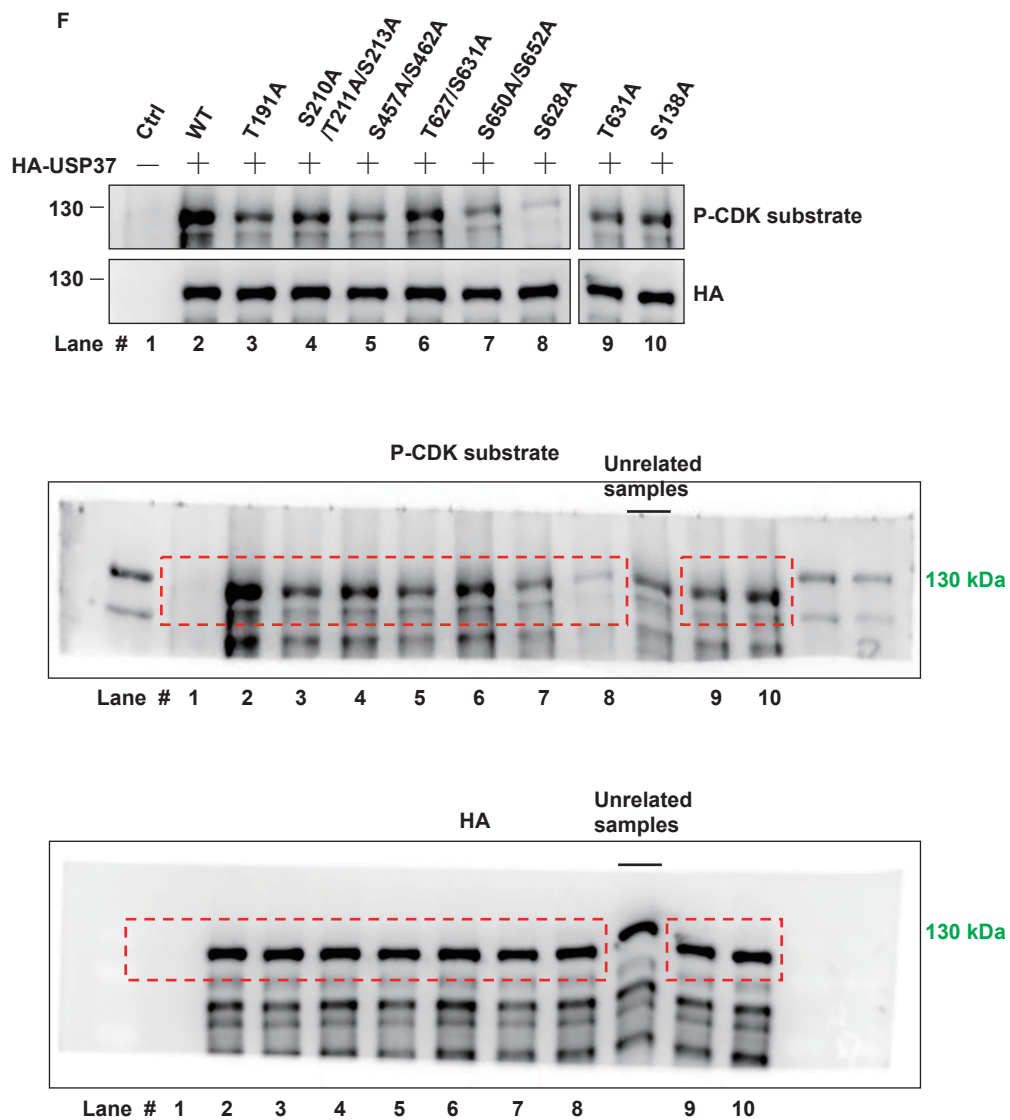

Source Data Figure.6H

H

|          |   |    |    |
|----------|---|----|----|
| HA-USP37 | - | WT | SA |
| Myc-ERK2 | + | +  | +  |
| His-ub   | + | +  | +  |
| MG132    | + | +  | +  |

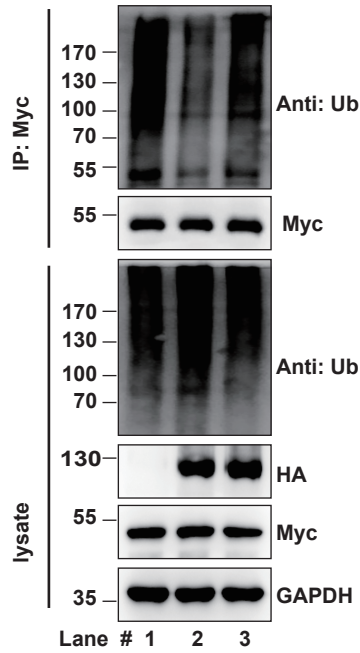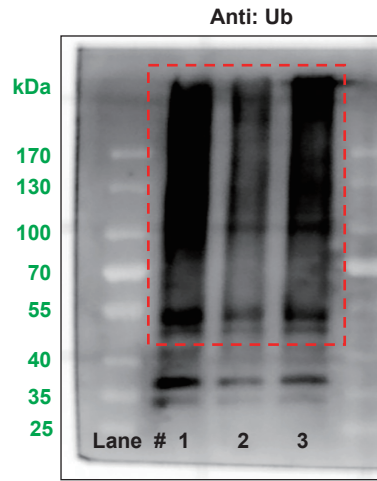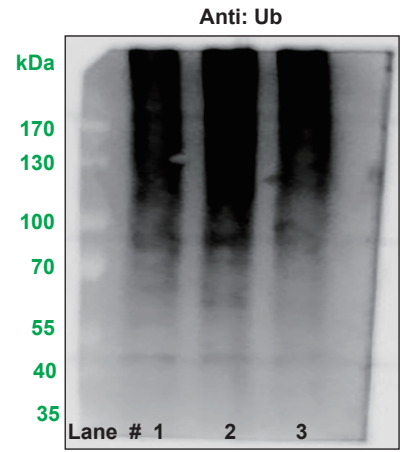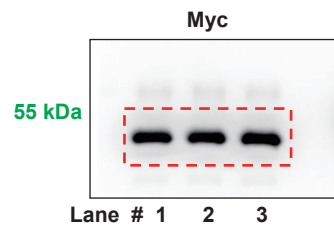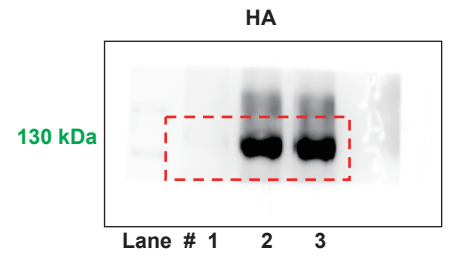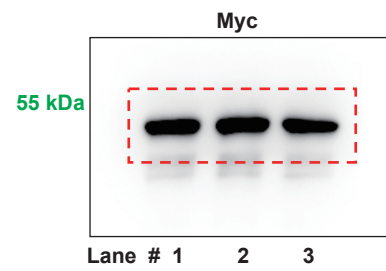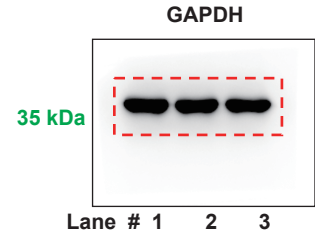

Source Data Figure.6I

I

|          |   |    |    |
|----------|---|----|----|
| HA-USP37 | - | WT | SA |
| His-ub   | + | +  | +  |
| MG132    | + | +  | +  |

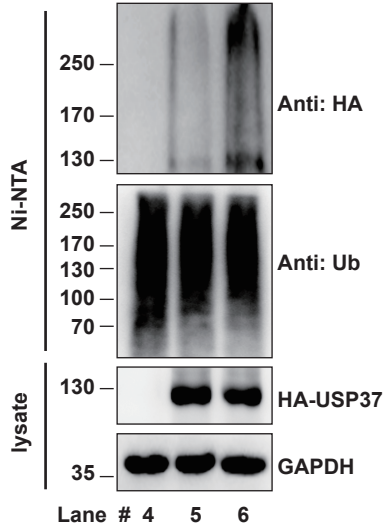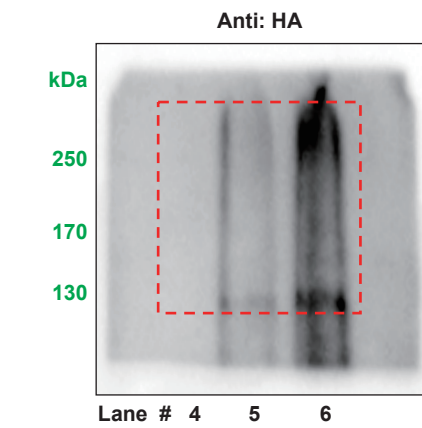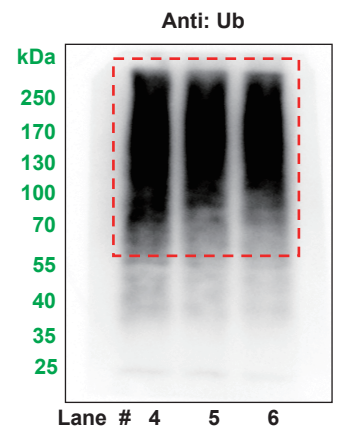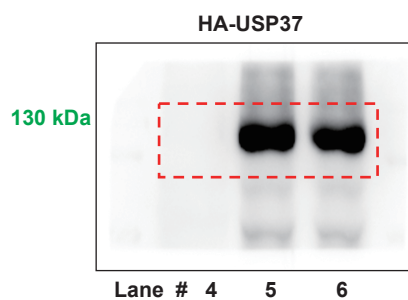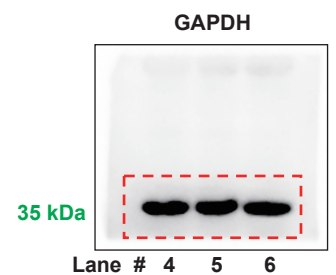

Source Data Figure.6J

J

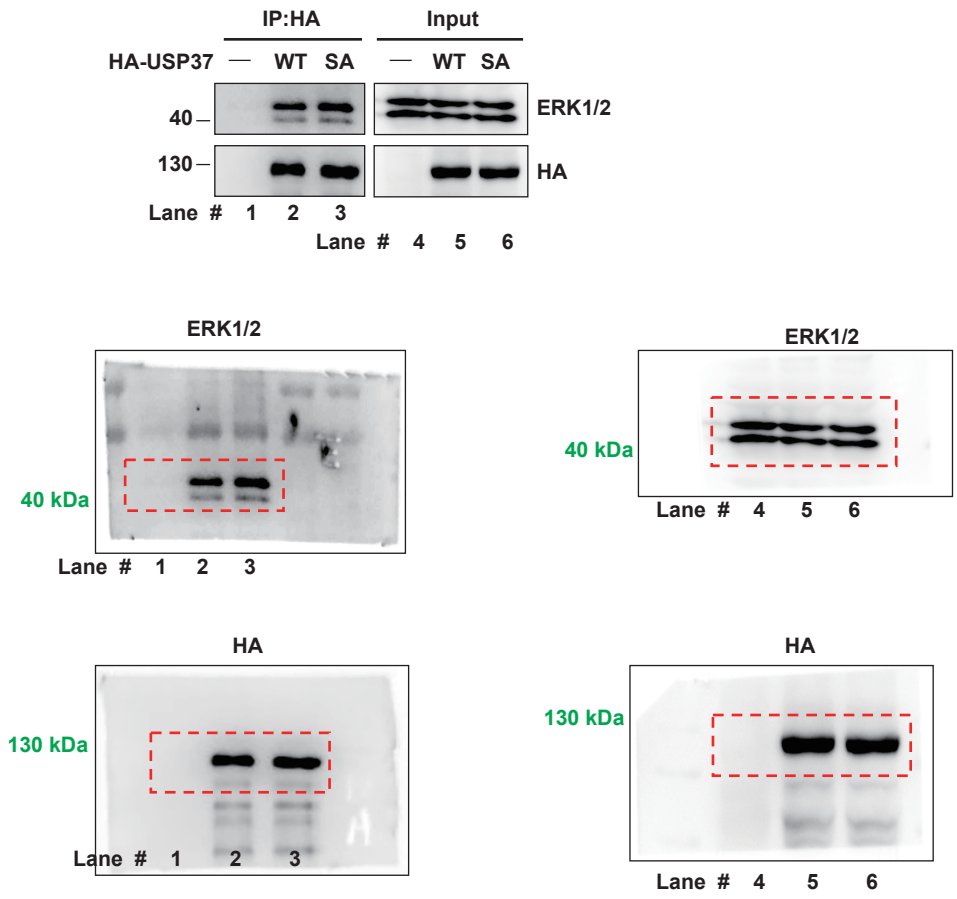

Source Data Figure.6K

K

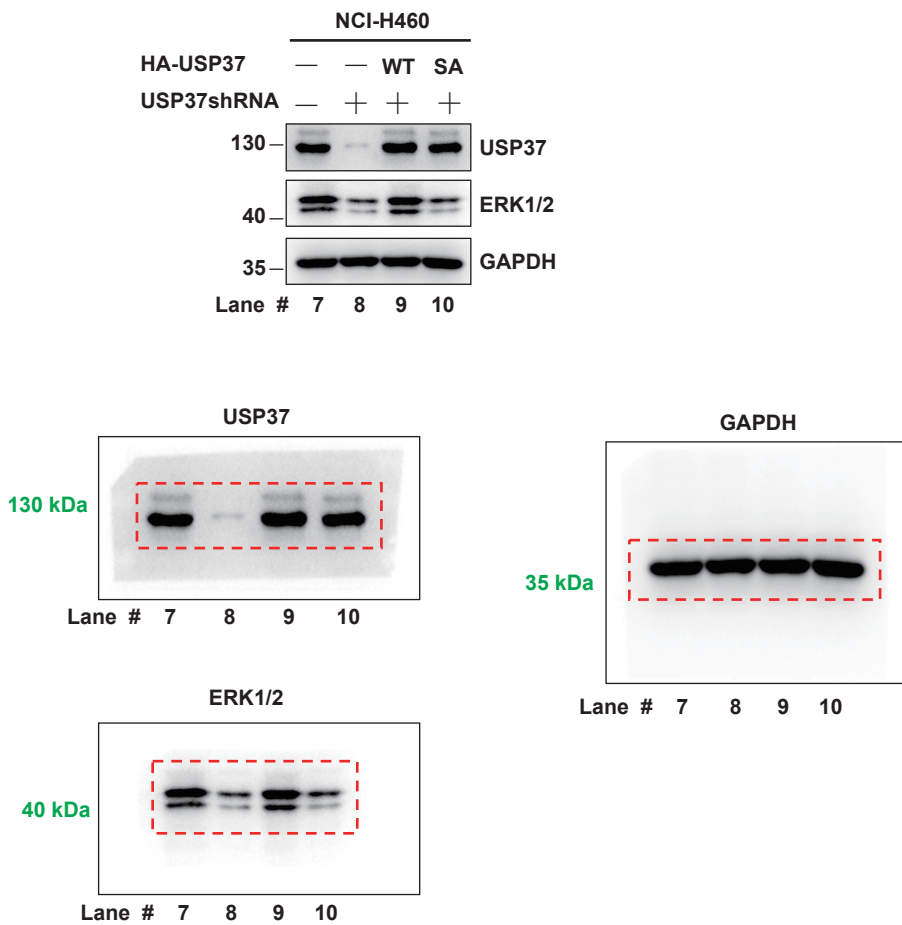

Source Data Figure.6L

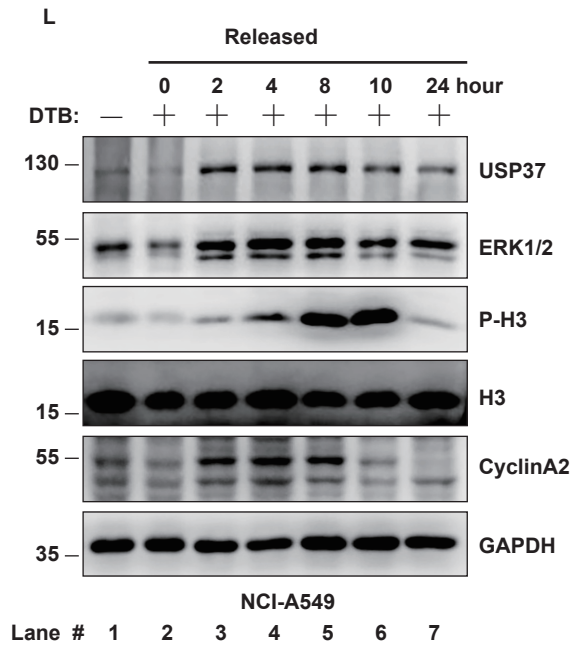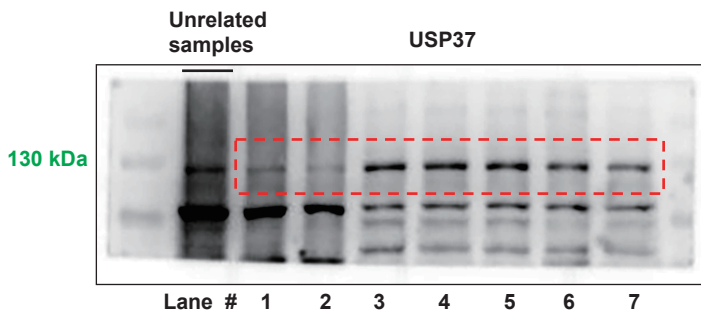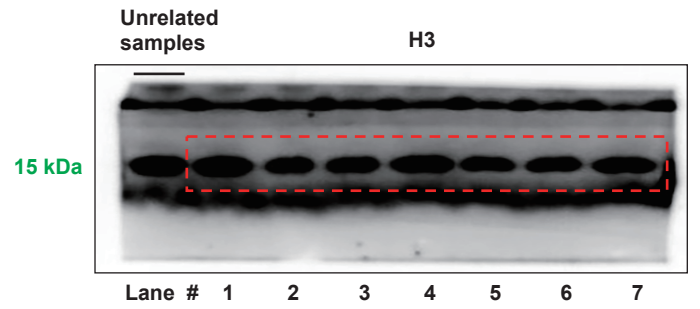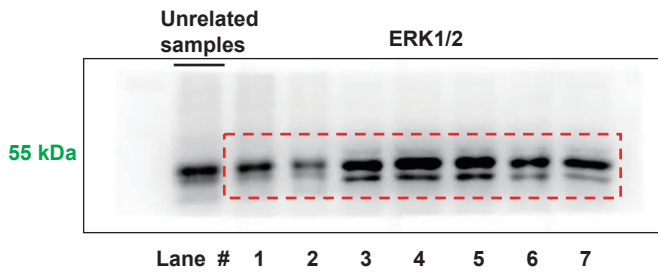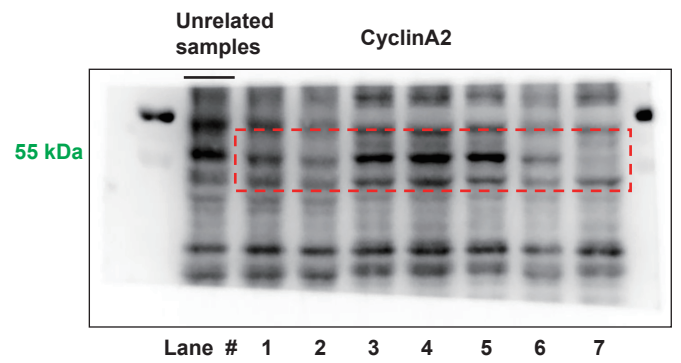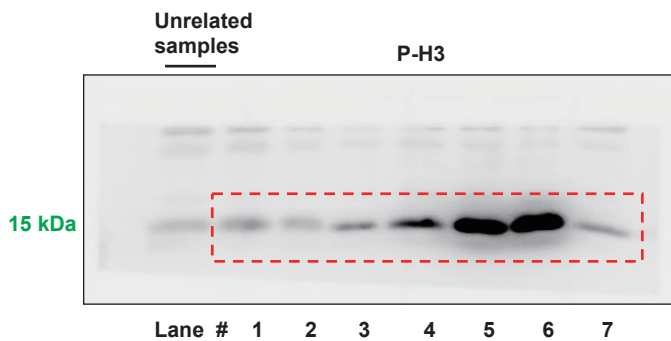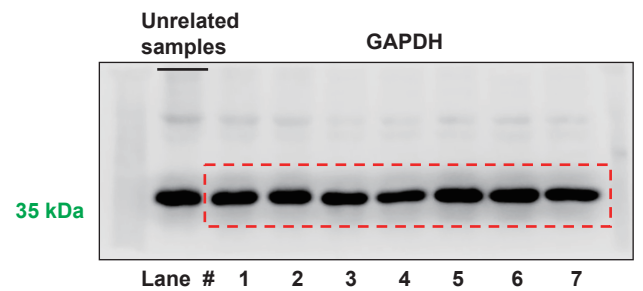

Supplement: JCB_202203005_SourceDataF6.pdf [file JCB_202203005_SourceDataF6.pdf]
