# Supplementary material for: Synergistic anticancer effect by targeting CDK2 and EGFR–ERK signaling
Source: PubMed Central journal article supplement — J Cell Biol. 2023 Nov 13;223(1):e202203005. doi: 10.1083/jcb.202203005 (PMC10641568; doi:10.1083/jcb.202203005), 2023-11-13

Source Data Figure.S4B

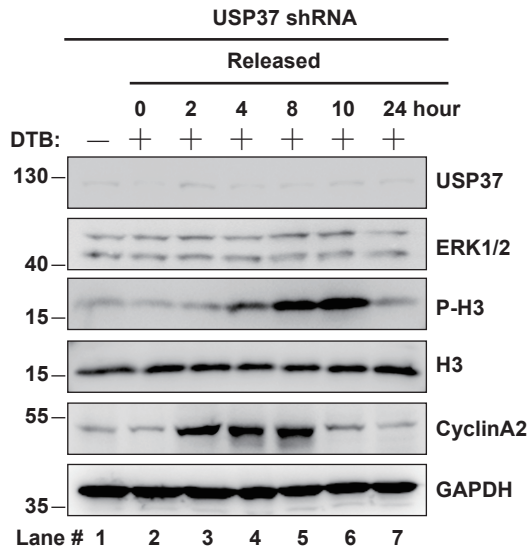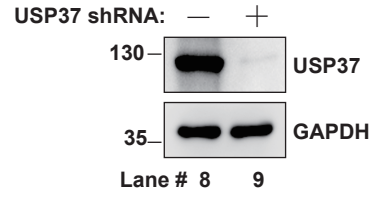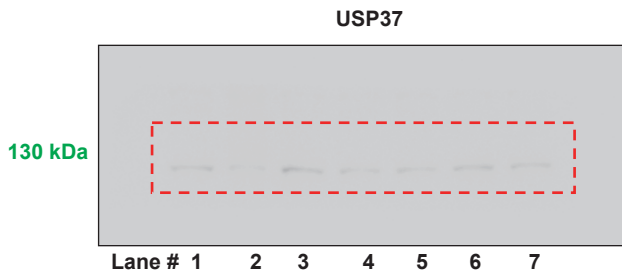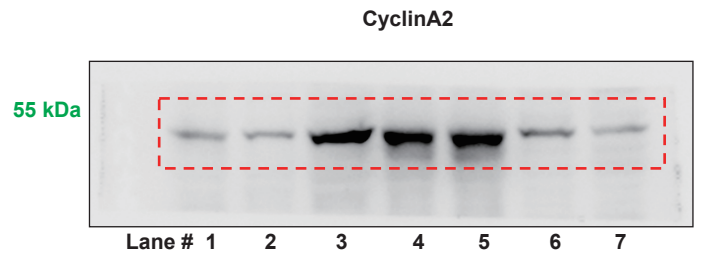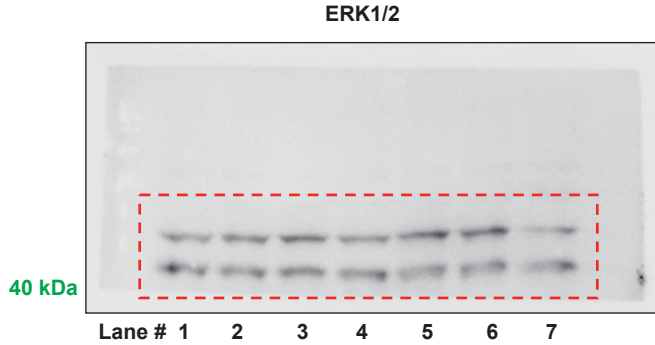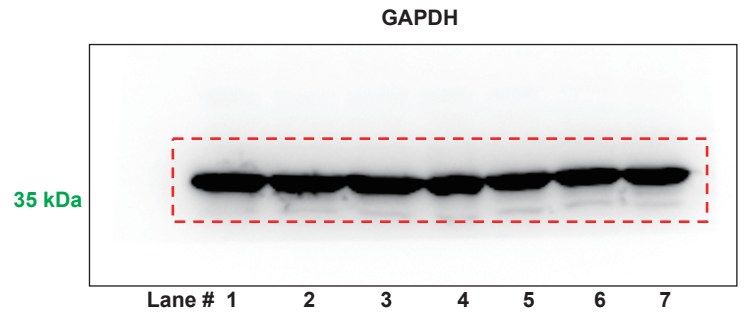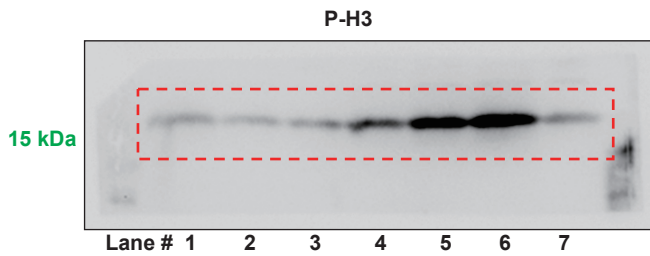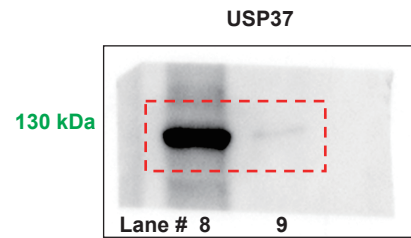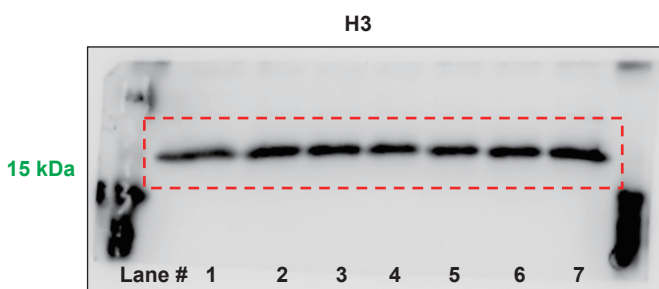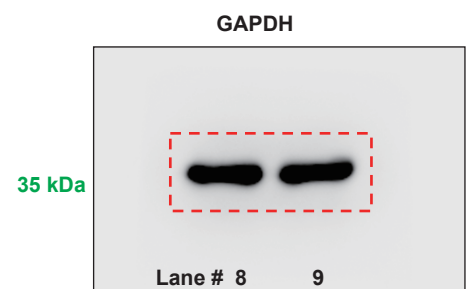

Source Data Figure.S4C

|             | DTB | Ctrl | 0 | 2 | 4 | 8 | 10 | 24 h |
|-------------|-----|------|---|---|---|---|----|------|
| His-ub      | +   | +    | + | + | + | + | +  | +    |
| Myc-ER1K1/2 | +   | +    | + | + | + | + | +  | +    |
| MG132       | +   | +    | + | + | + | + | +  | +    |

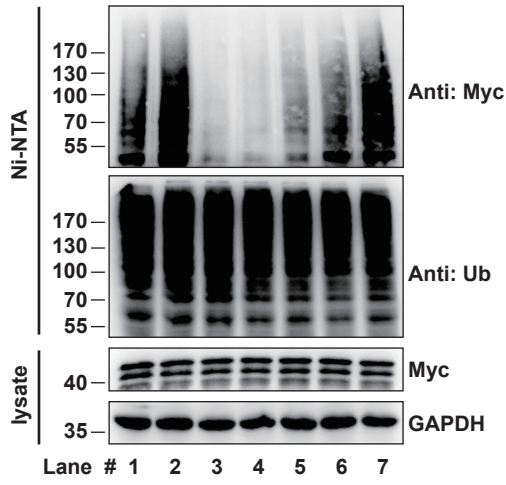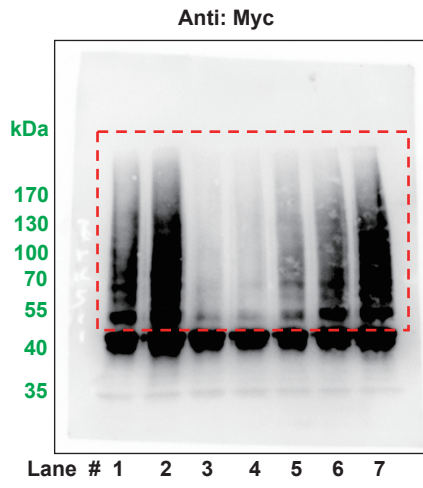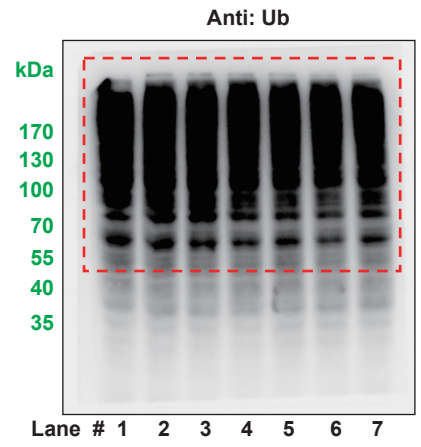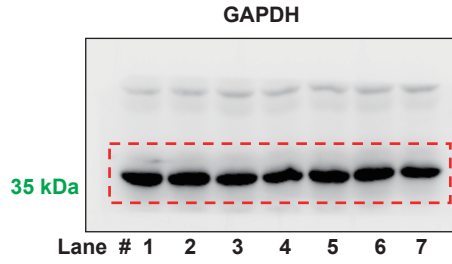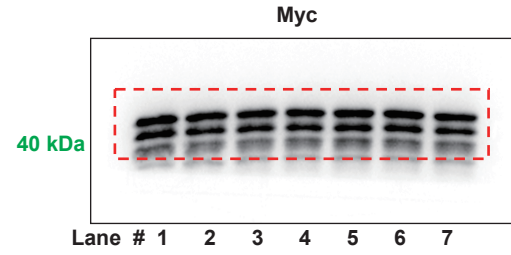

Source Data Figure.S4D

|          | DTB | Ctrl | 0 | 2 | 4 | 8 | 10 | 24 h |
|----------|-----|------|---|---|---|---|----|------|
| His-ub   | +   | +    | + | + | + | + | +  | +    |
| HA-USP37 | +   | +    | + | + | + | + | +  | +    |
| MG132    | +   | +    | + | + | + | + | +  | +    |

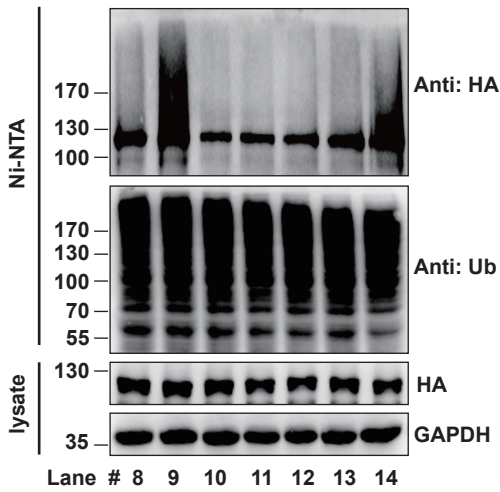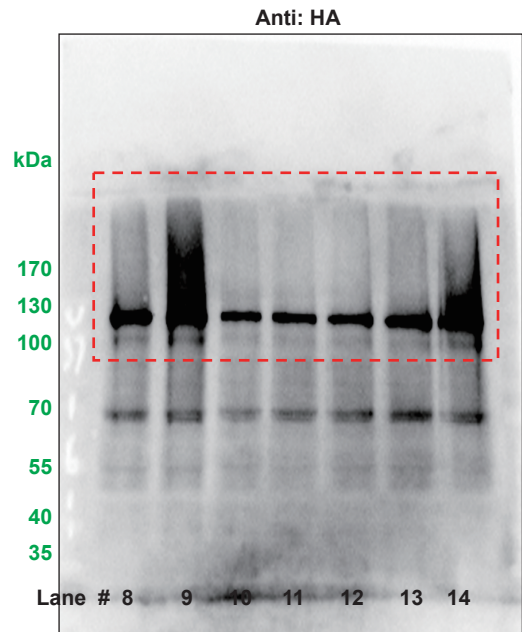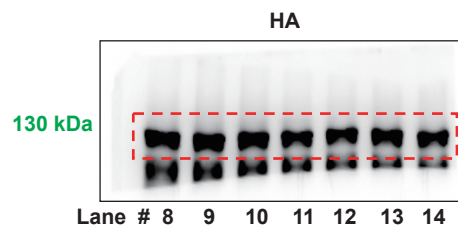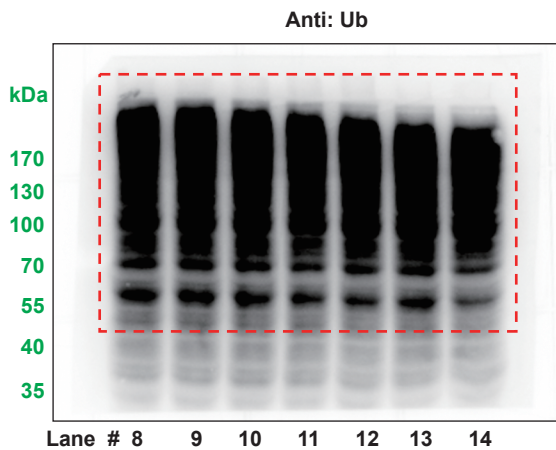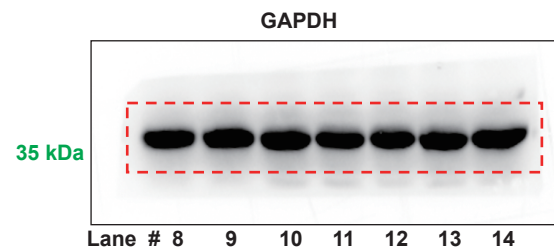

Source Data Figure.S4E

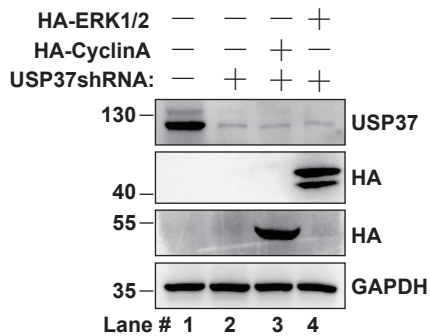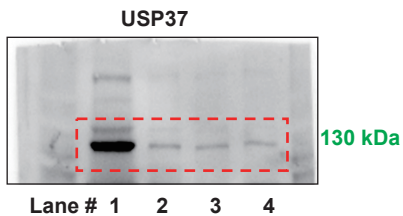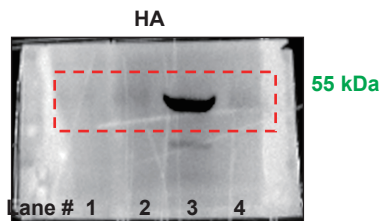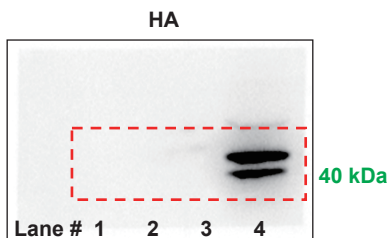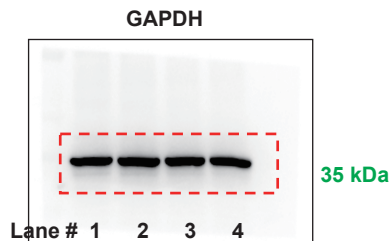

Source Data Figure.S4H

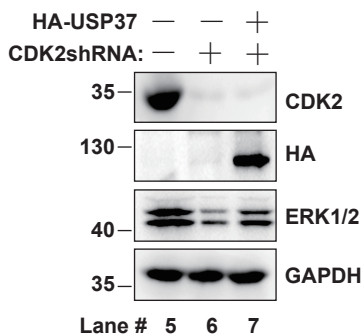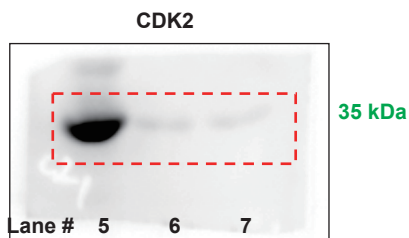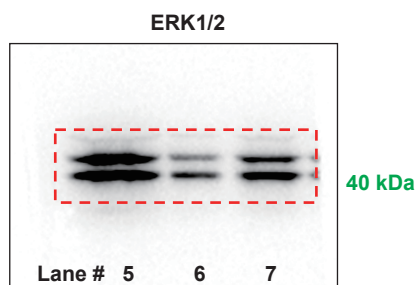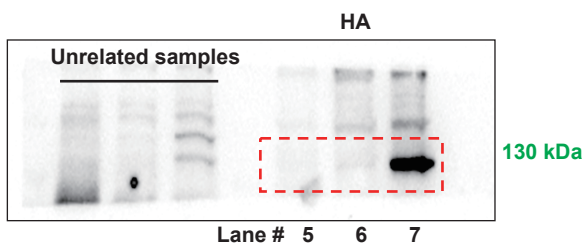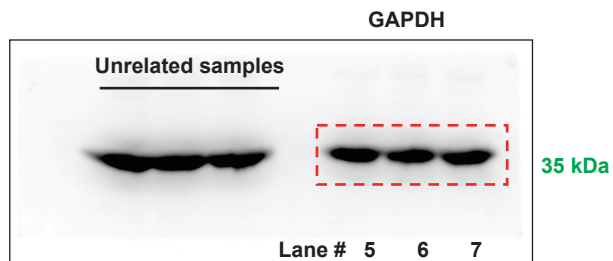

Source Data Figure.S4J

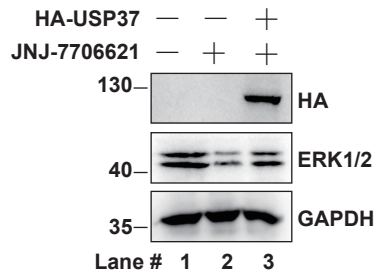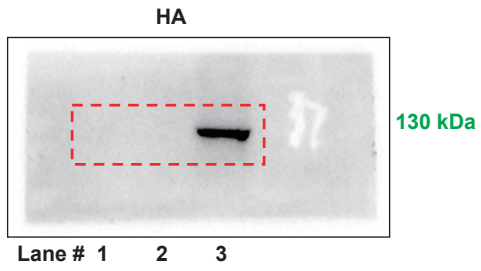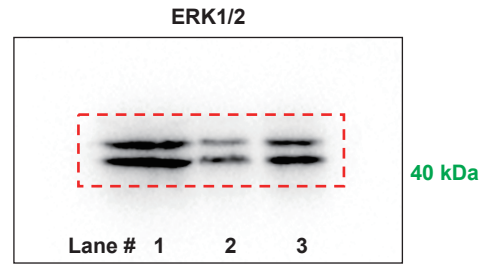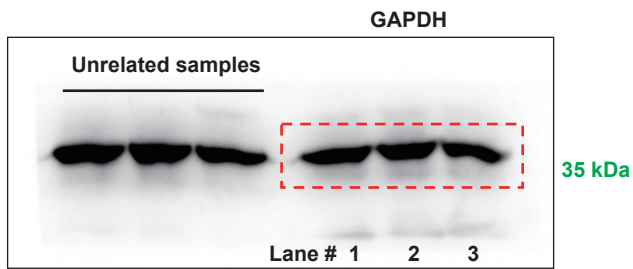

Supplement: JCB_202203005_SourceDataFS4.pdf [file JCB_202203005_SourceDataFS4.pdf]
