# Supplementary material for: Synergistic anticancer effect by targeting CDK2 and EGFR–ERK signaling
Source: PubMed Central journal article supplement — J Cell Biol. 2023 Nov 13;223(1):e202203005. doi: 10.1083/jcb.202203005 (PMC10641568; doi:10.1083/jcb.202203005), 2023-11-13

Source Data Figure.3A

A

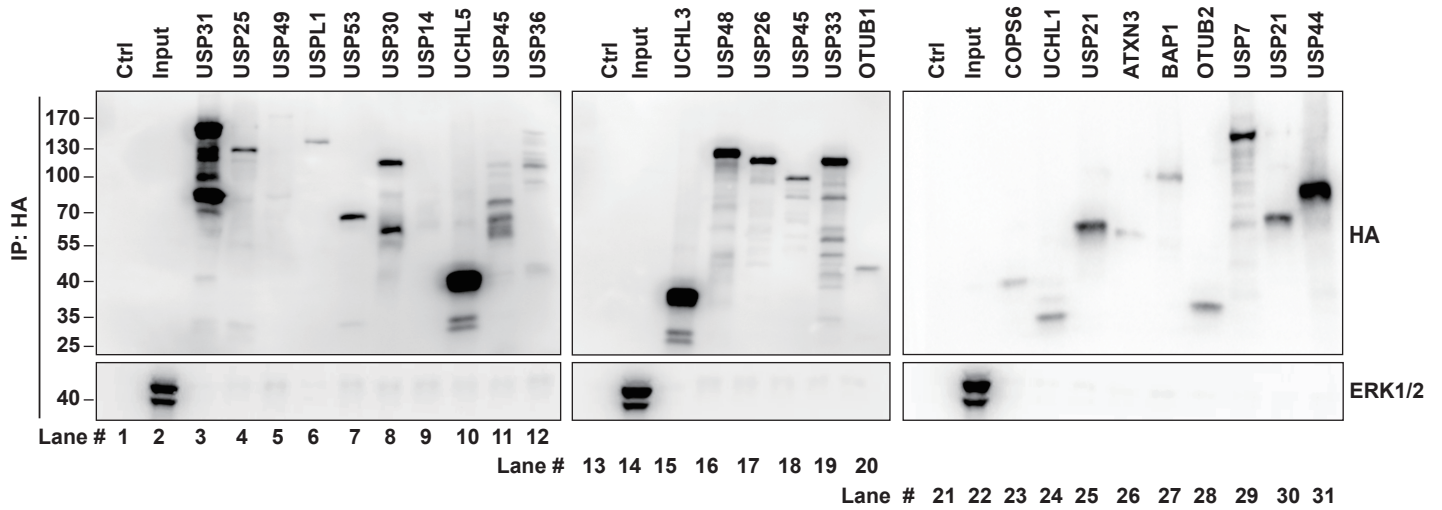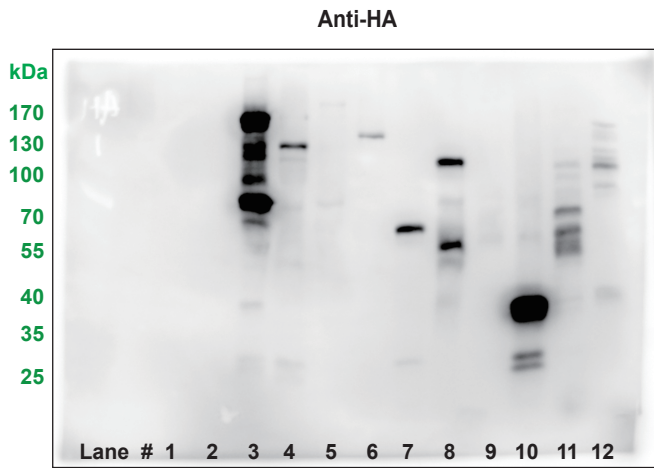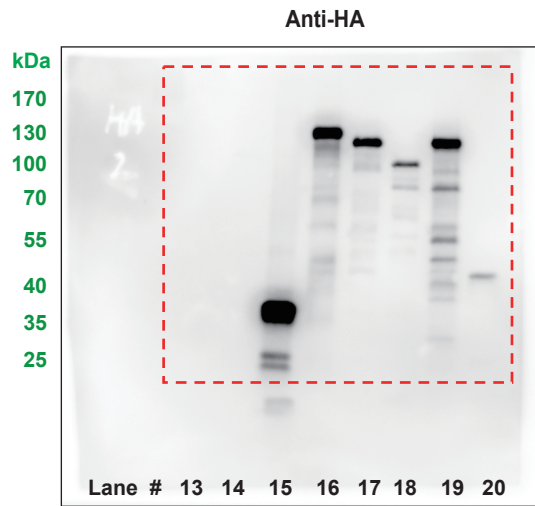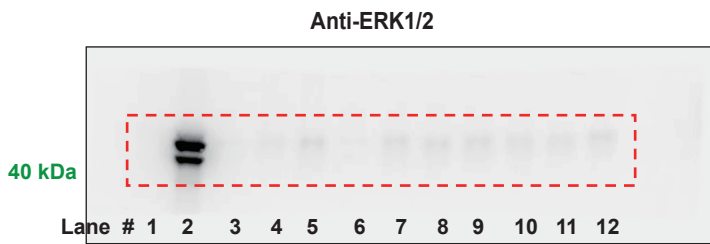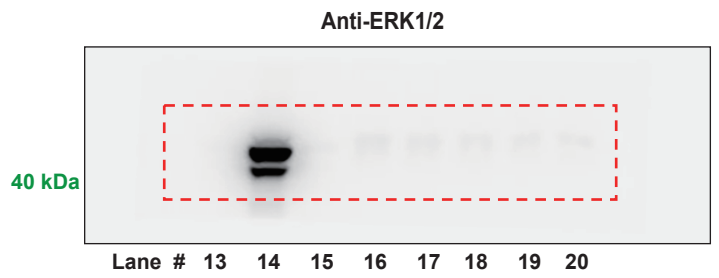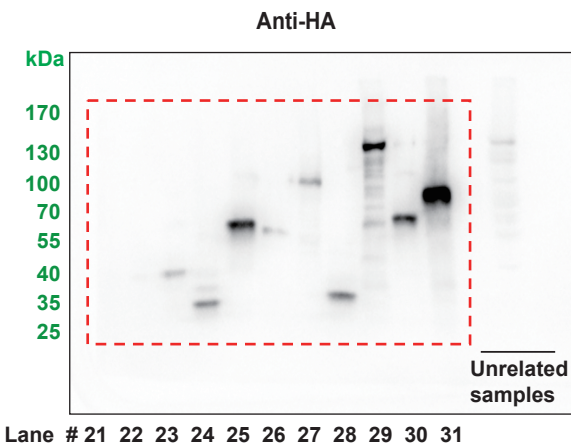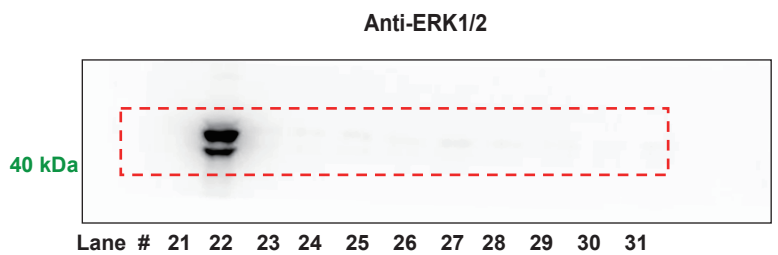

Source Data Figure.3B

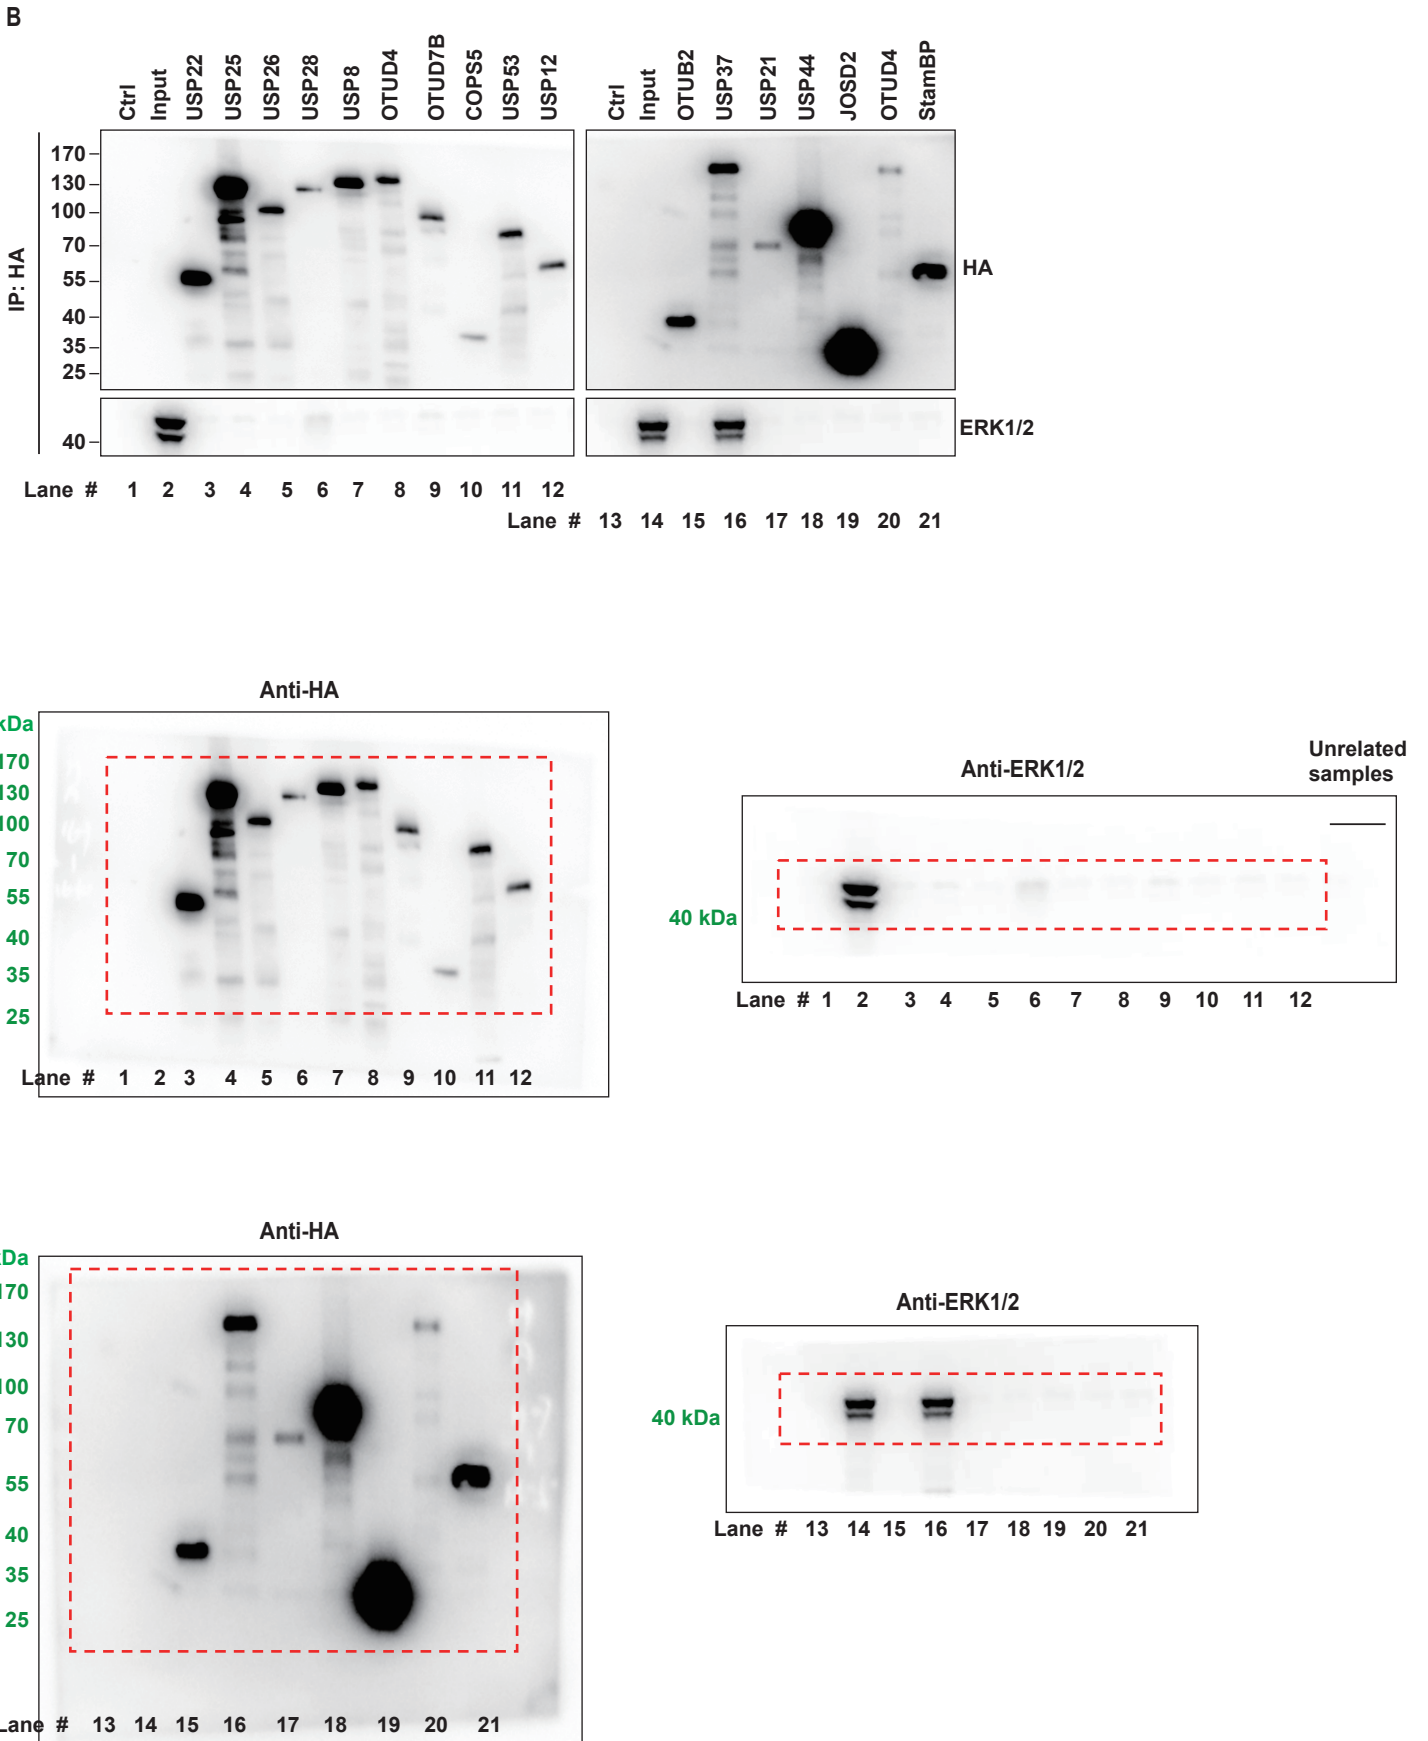

Source Data Figure.3C

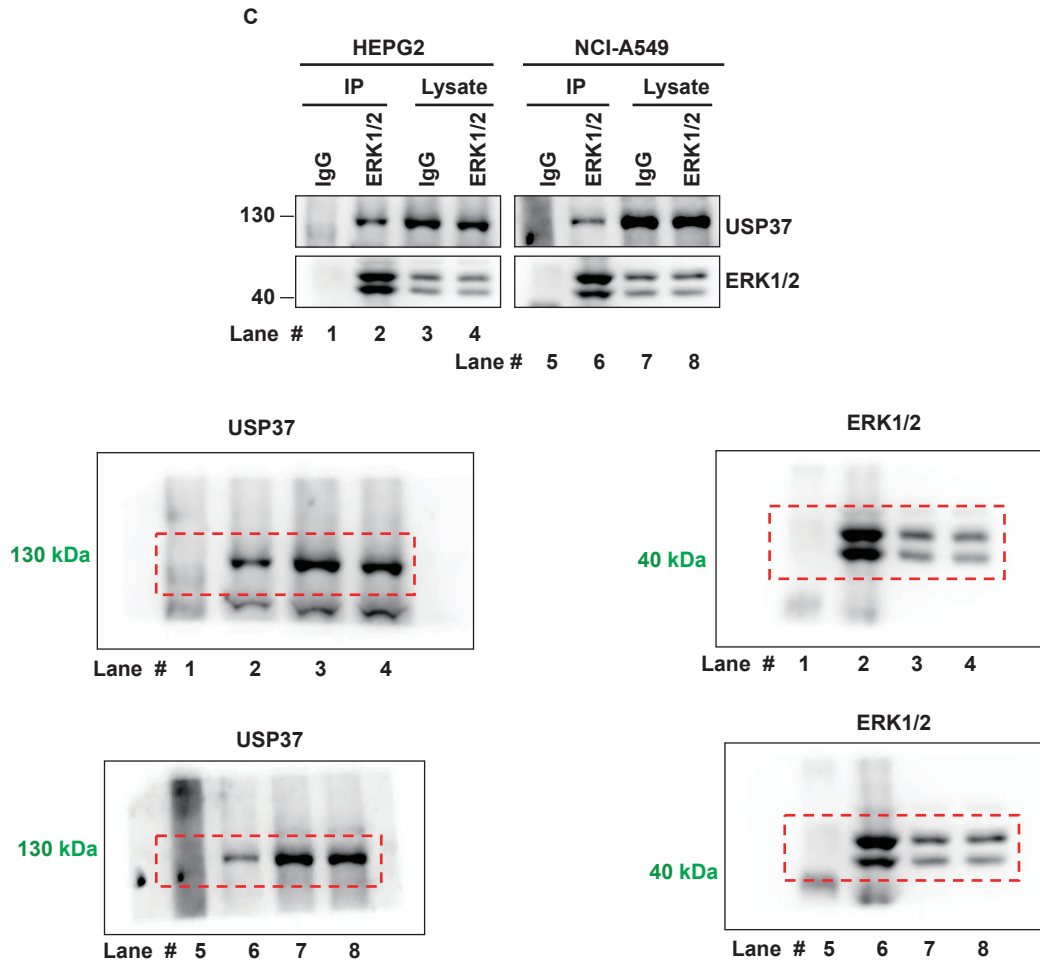

Source Data Figure.3D

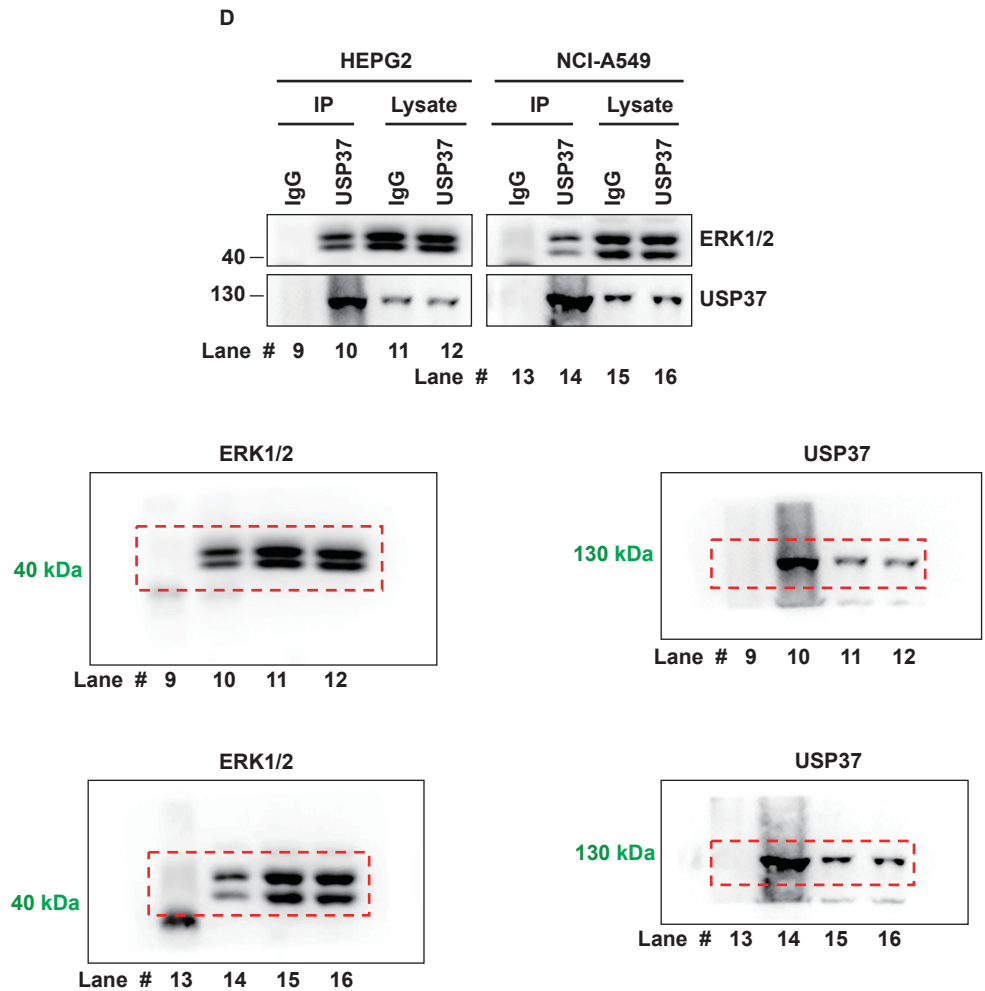

Source Data Figure.3E

E

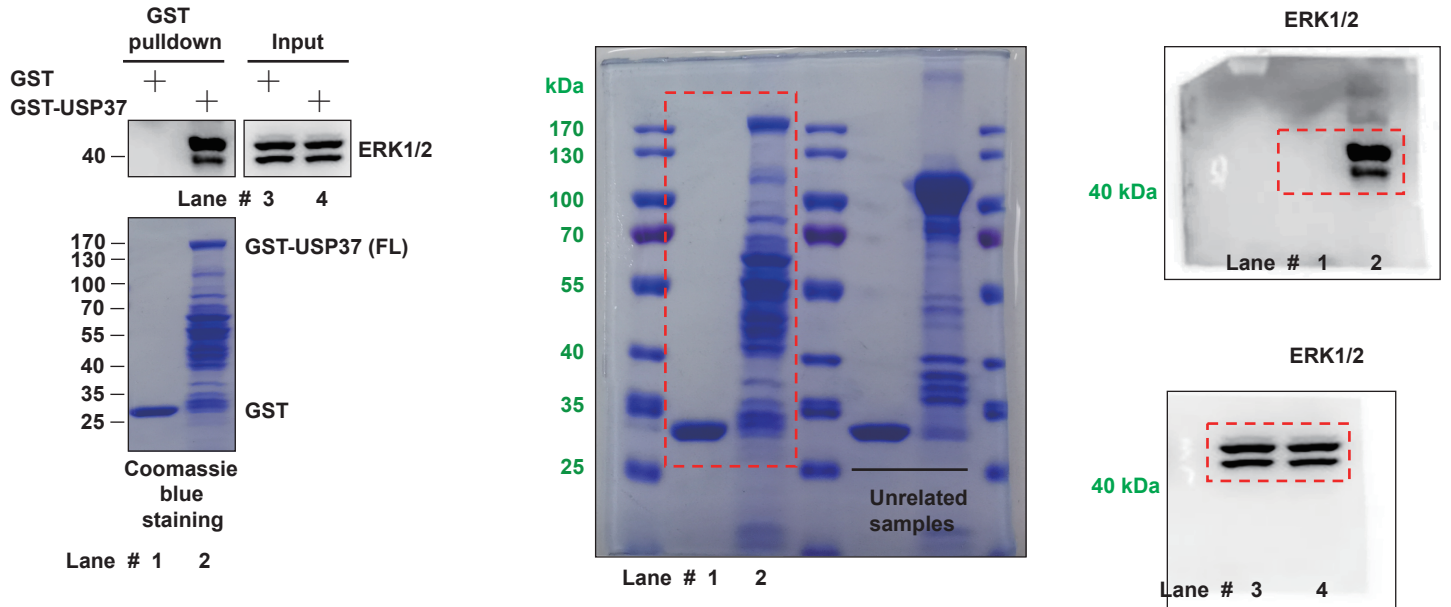

Source Data Figure.3F

F

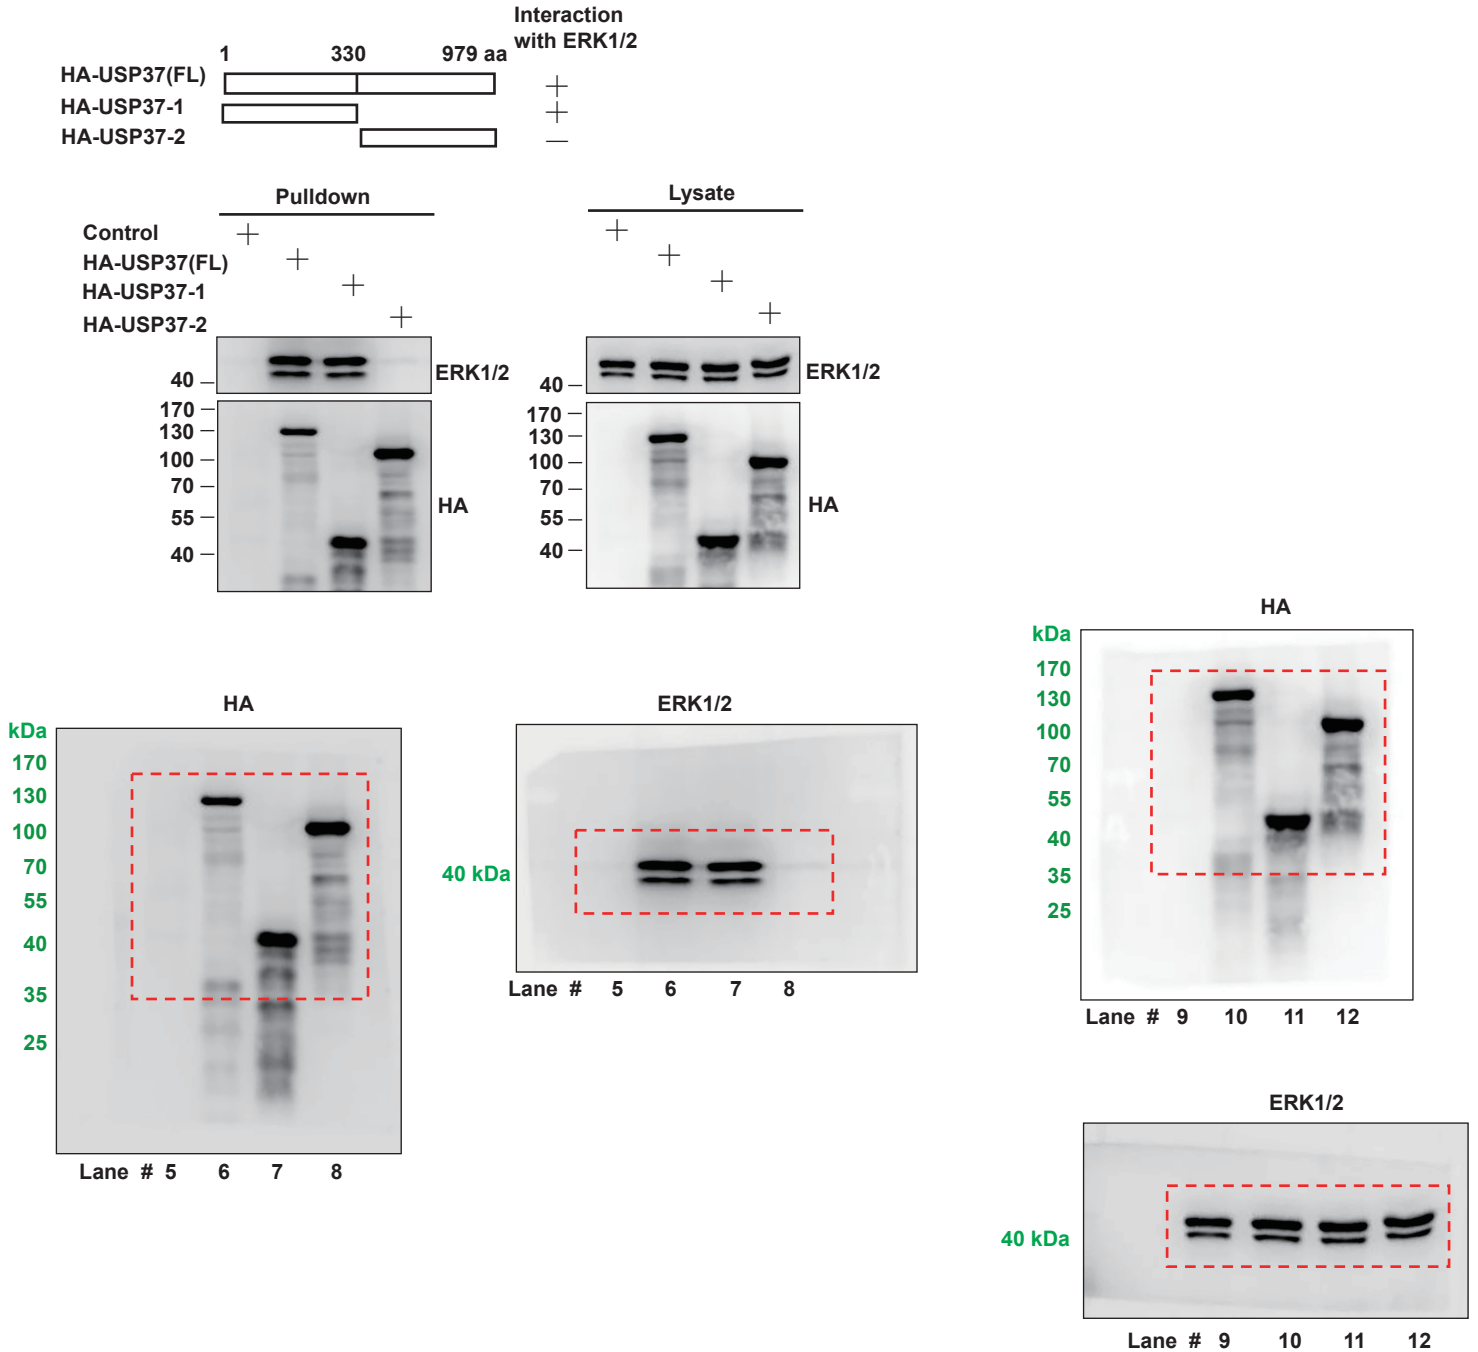

Supplement: JCB_202203005_SourceDataF3.pdf [file JCB_202203005_SourceDataF3.pdf]
