# Supplementary material for: Synergistic anticancer effect by targeting CDK2 and EGFR–ERK signaling
Source: PubMed Central journal article supplement — J Cell Biol. 2023 Nov 13;223(1):e202203005. doi: 10.1083/jcb.202203005 (PMC10641568; doi:10.1083/jcb.202203005), 2023-11-13

Source Data Figure.S3A

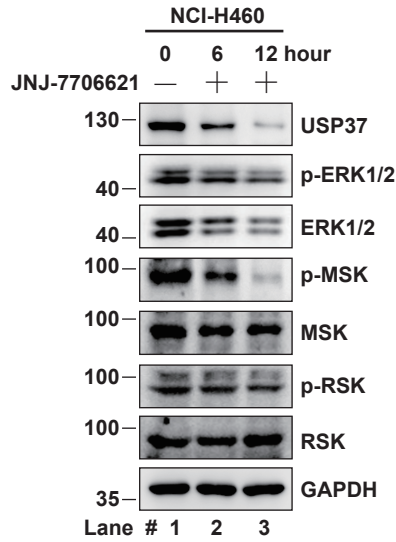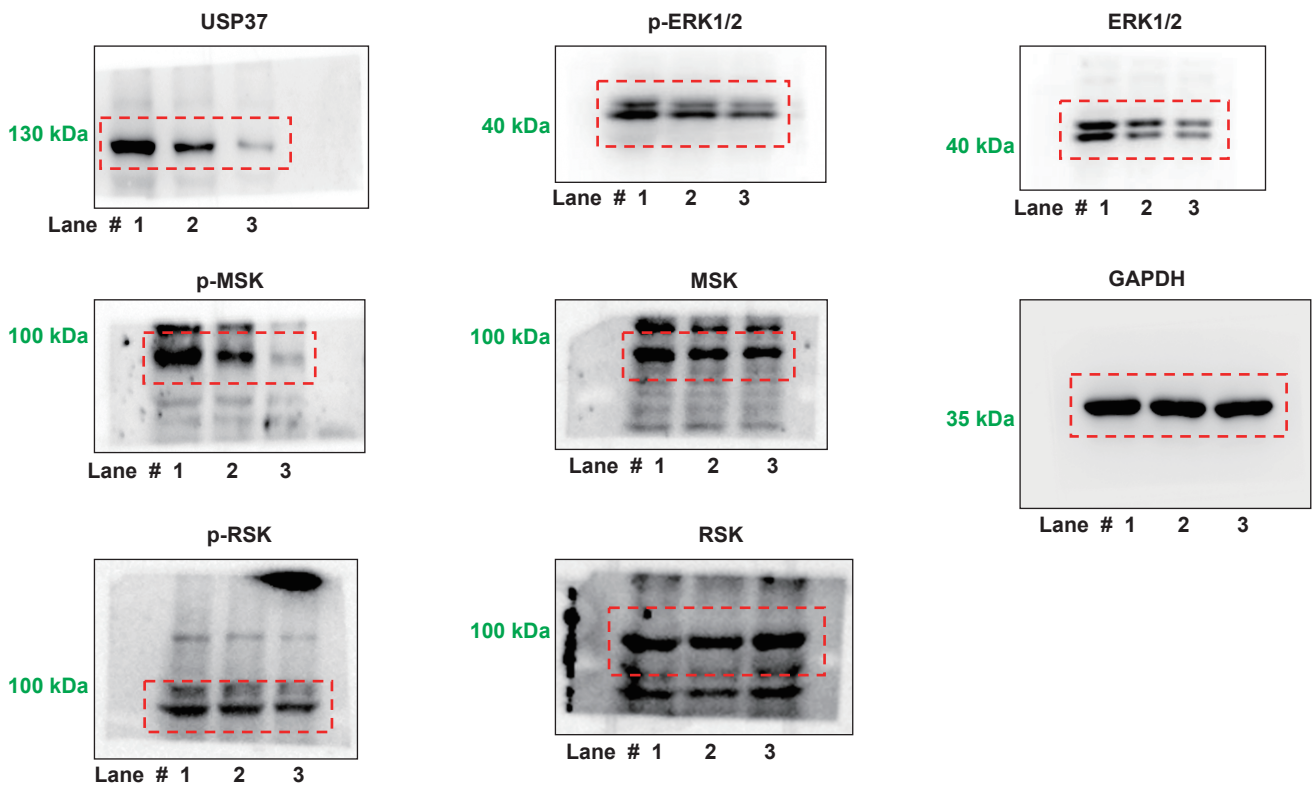

Source Data Figure.S3B

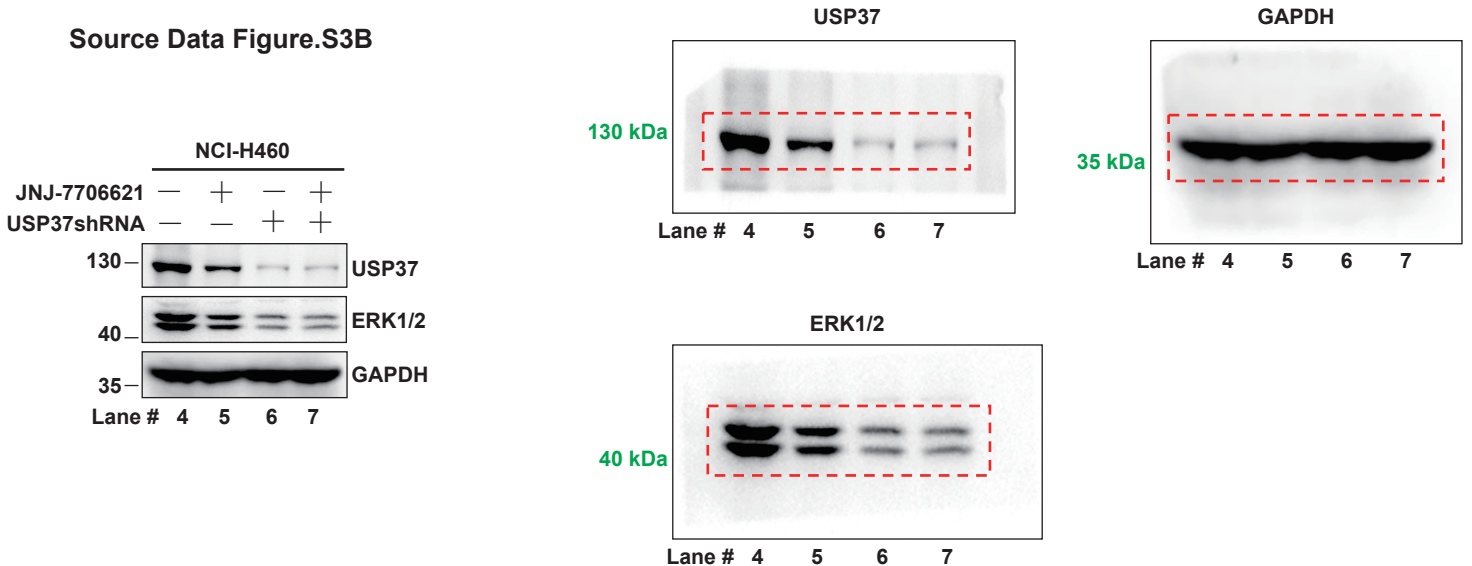



Source Data Figure.S3F

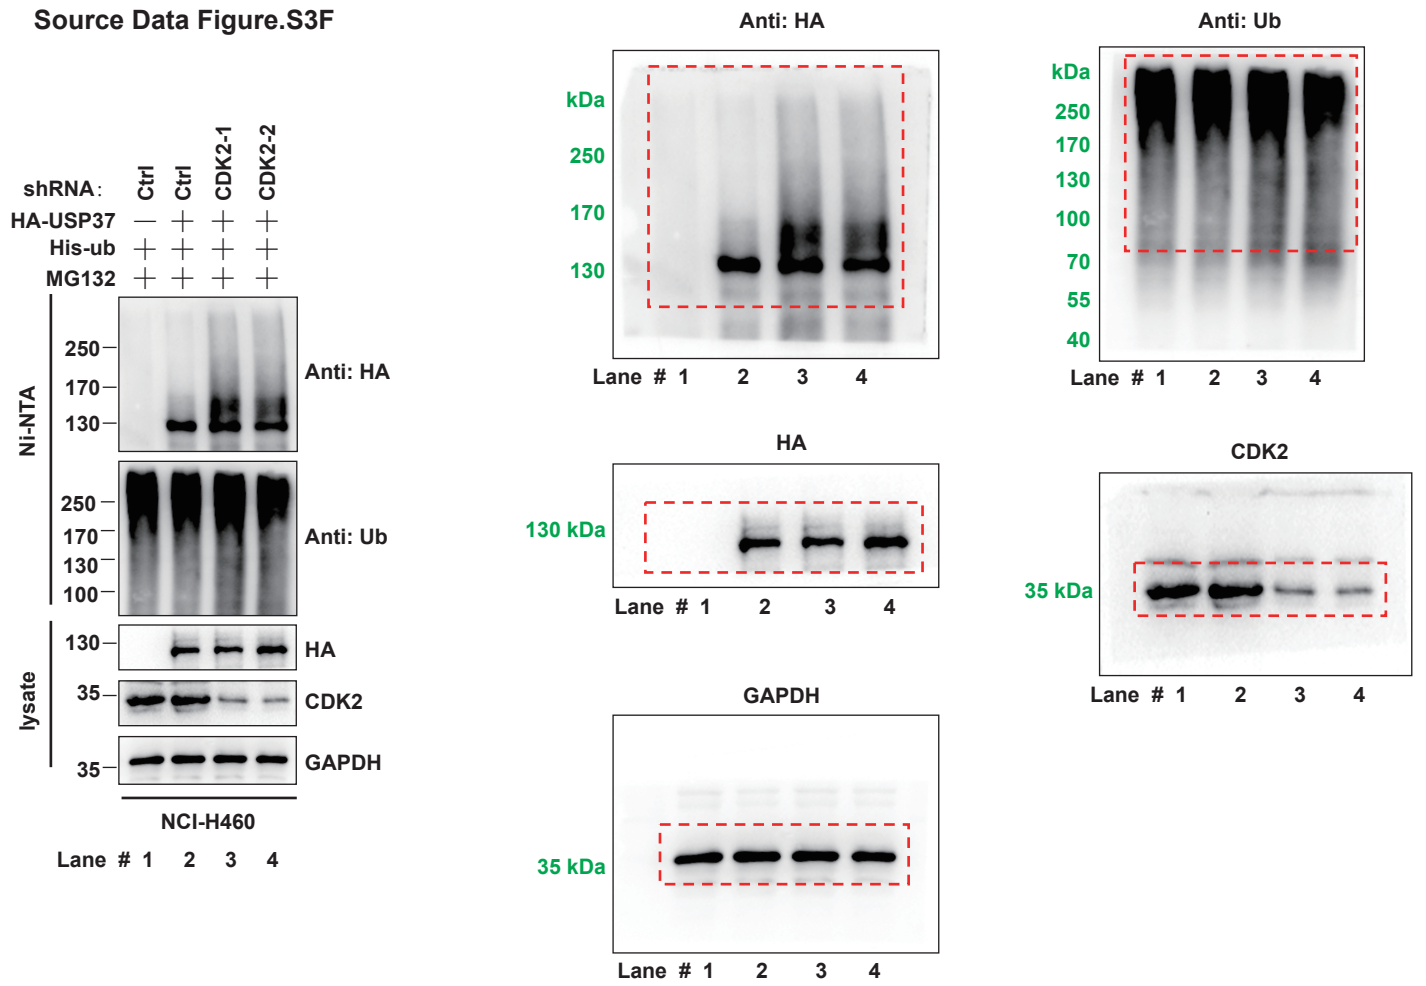

Source Data Figure.S3G

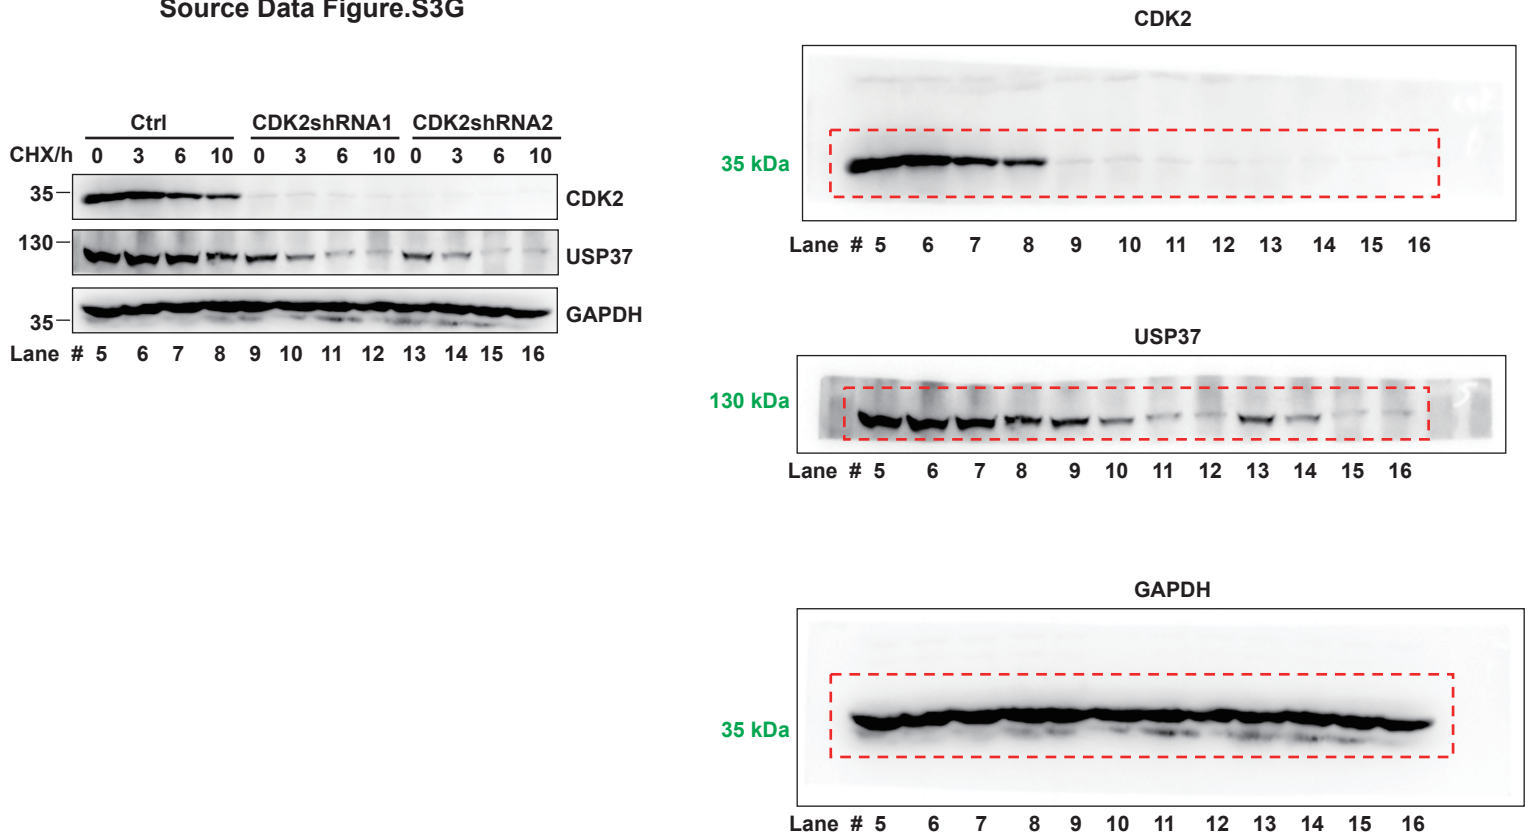

Source Data Figure.S3I

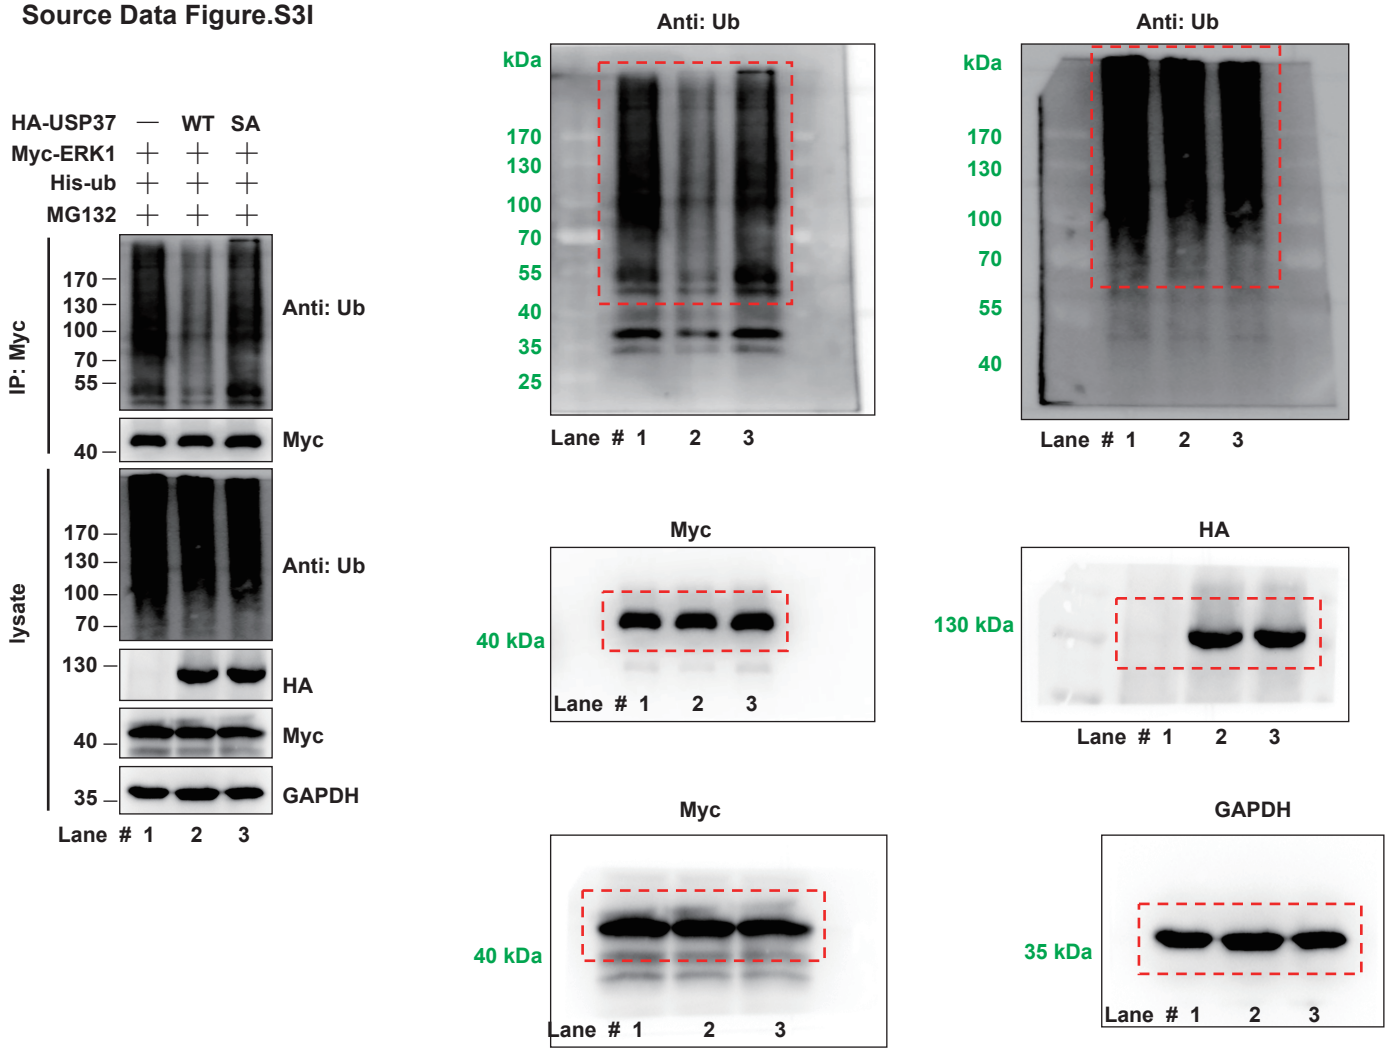

Source Data Figure.S3J

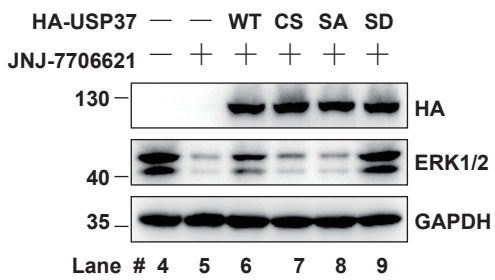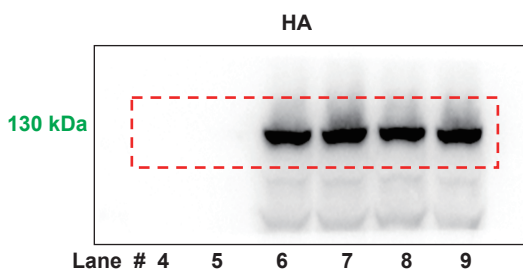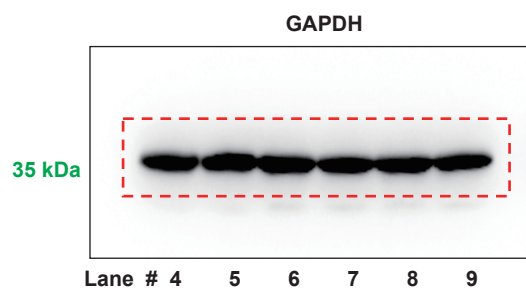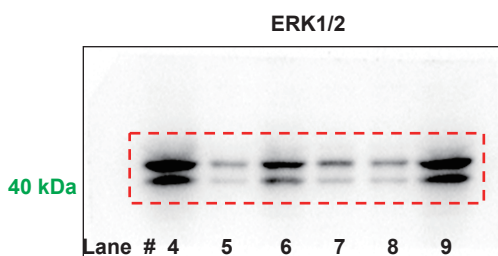

Supplement: JCB_202203005_SourceDataFS3.pdf [file JCB_202203005_SourceDataFS3.pdf]
