# Supplementary figures and images for: Synergistic anticancer effect by targeting CDK2 and EGFR–ERK signaling
Source: PubMed Central journal article supplement — J Cell Biol. 2023 Nov 13;223(1):e202203005. doi: 10.1083/jcb.202203005 (PMC10641568; doi:10.1083/jcb.202203005), 2023-11-13

Source Data Figure.1D

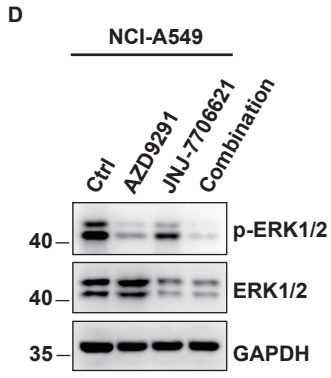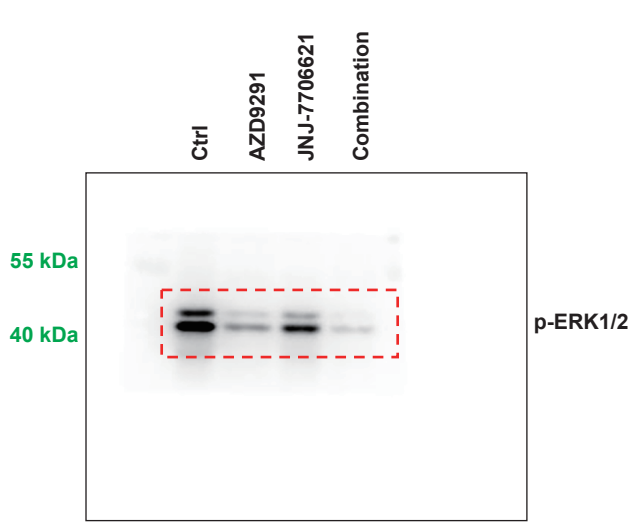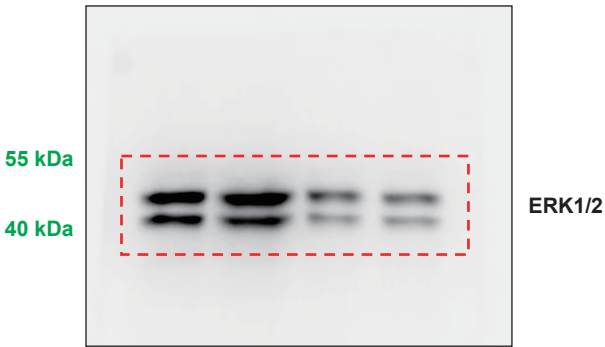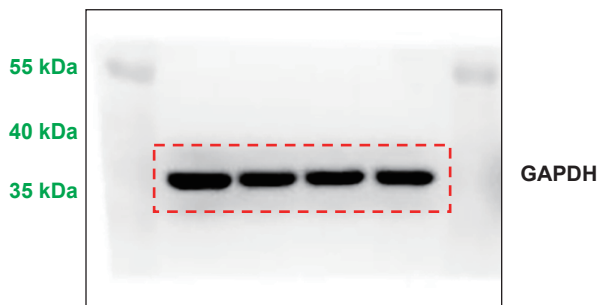

Source Data Figure.1E

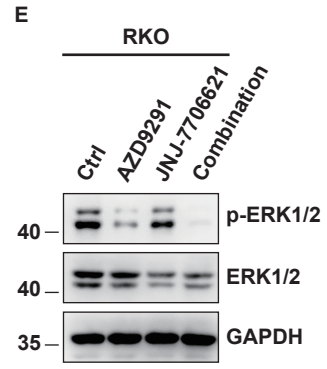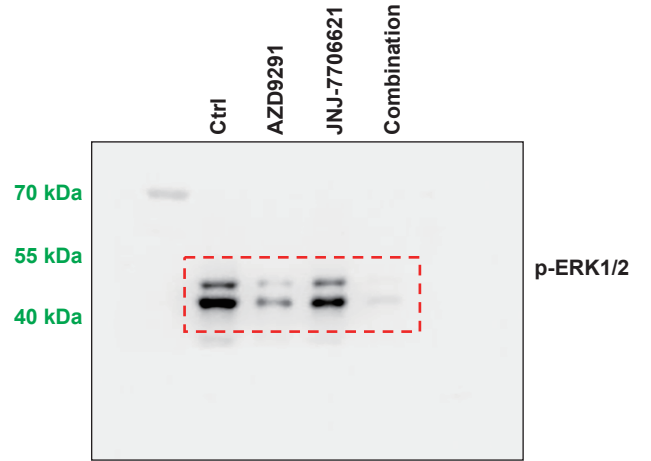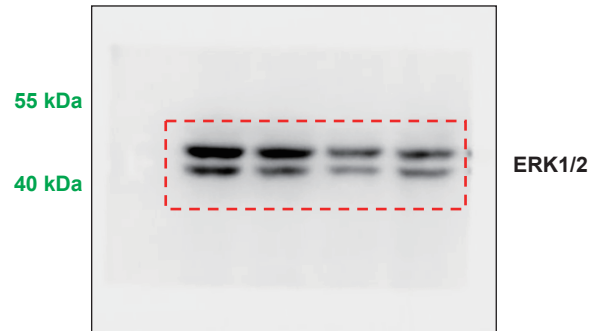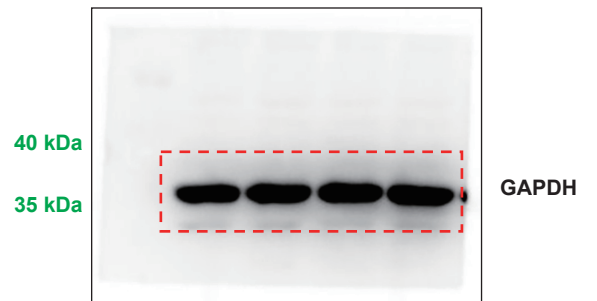

Source Data Figure.1F

F

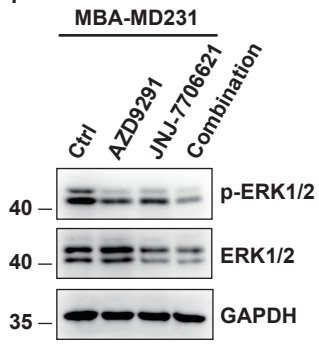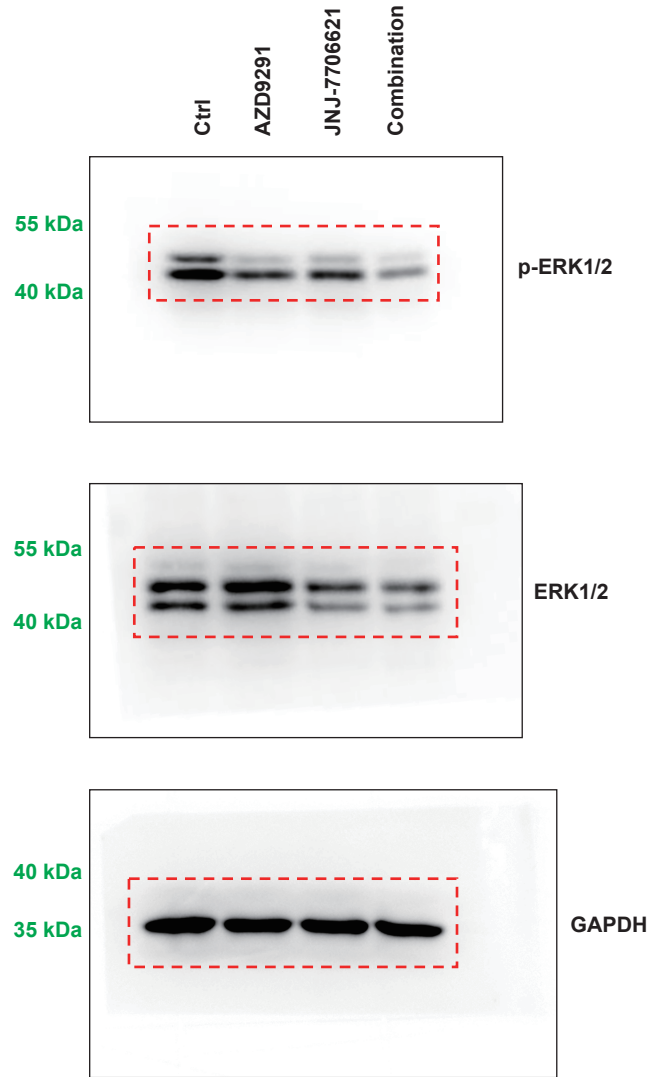

Supplement: JCB_202203005_SourceDataF1.pdf [file JCB_202203005_SourceDataF1.pdf]

Source Data Figure.5A

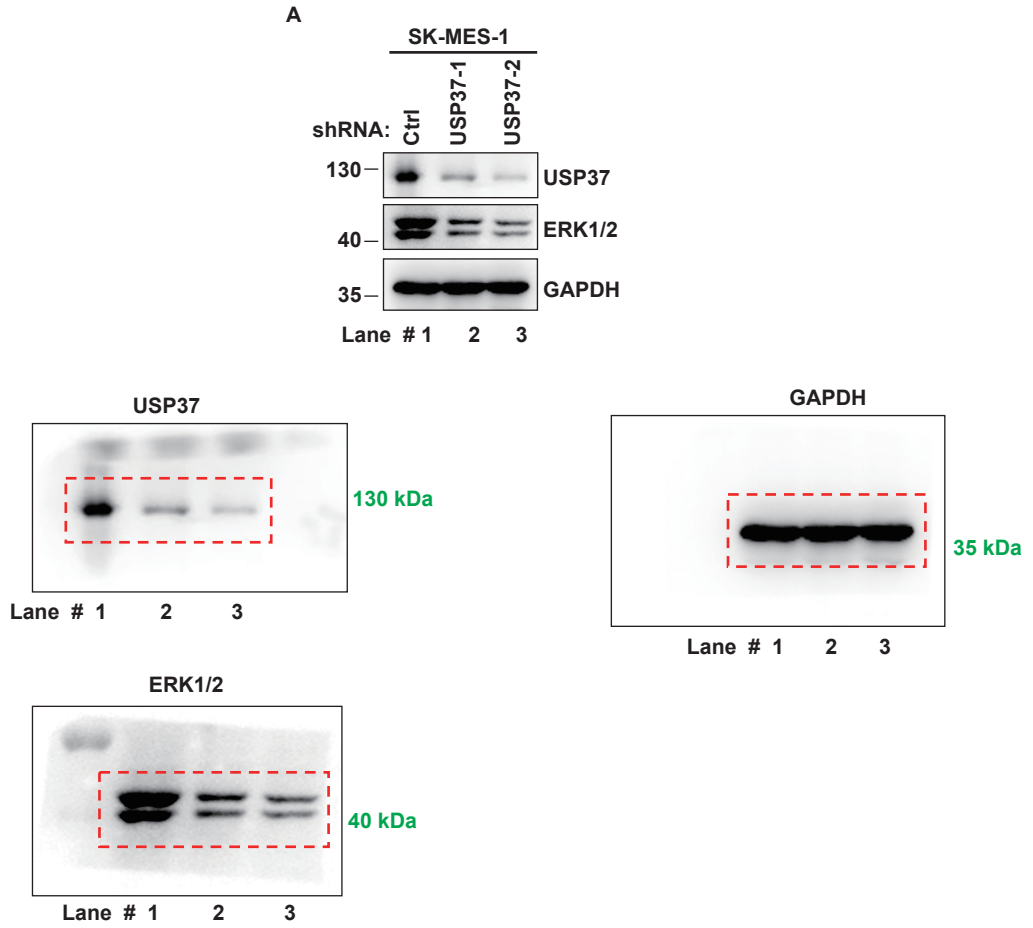

Source Data Figure.5F

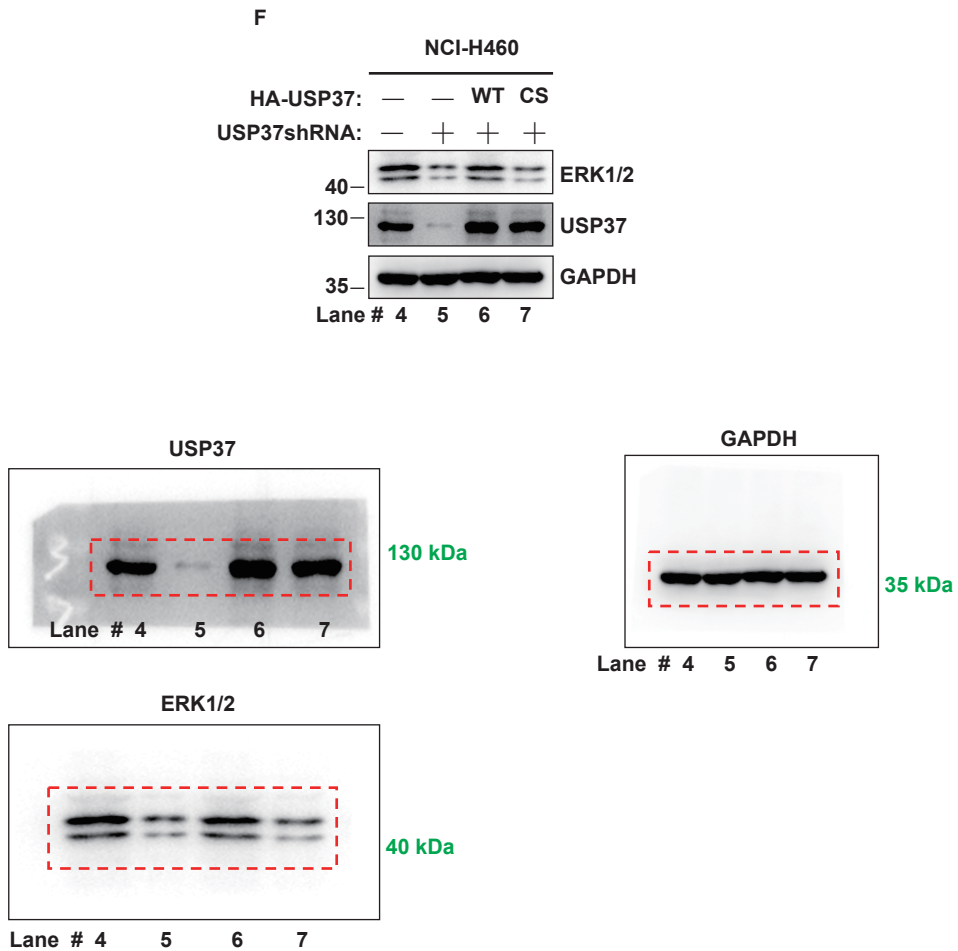

Source Data Figure.5I

I

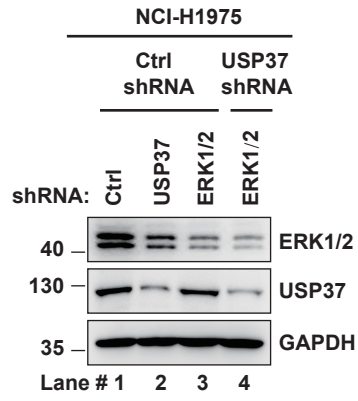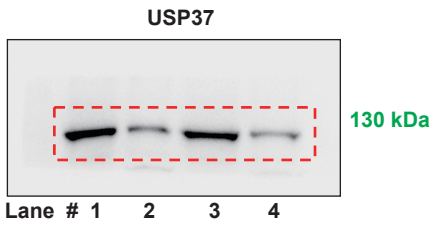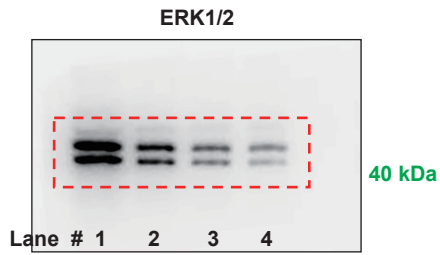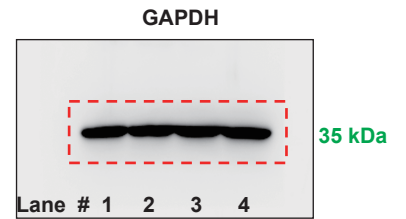

Source Data Figure.5L

L

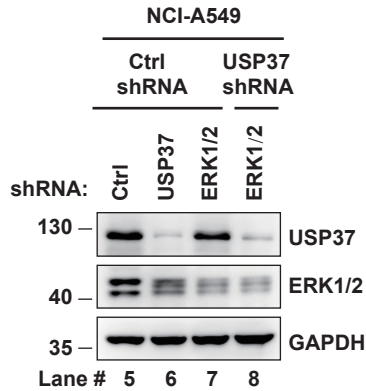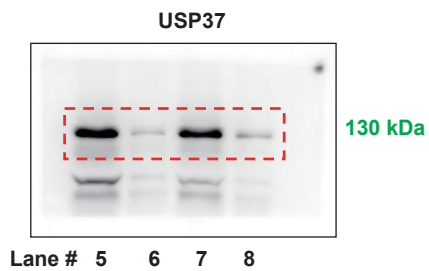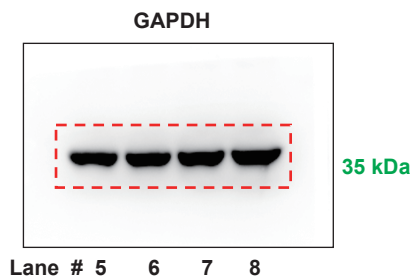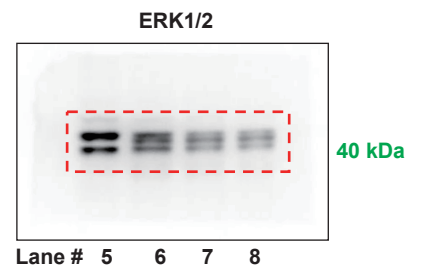

Supplement: JCB_202203005_SourceDataF5.pdf [file JCB_202203005_SourceDataF5.pdf]

Source Data Figure.7A

A

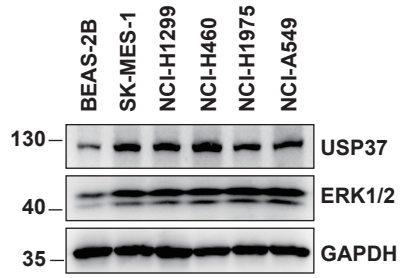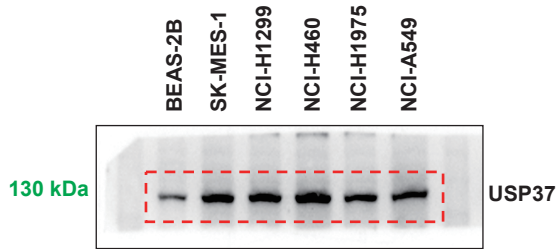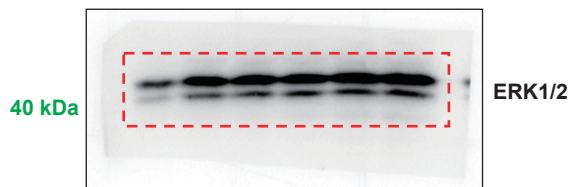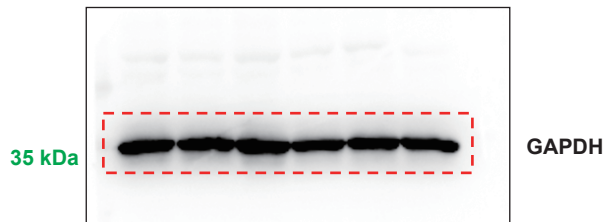

Source Data Figure.7C

C

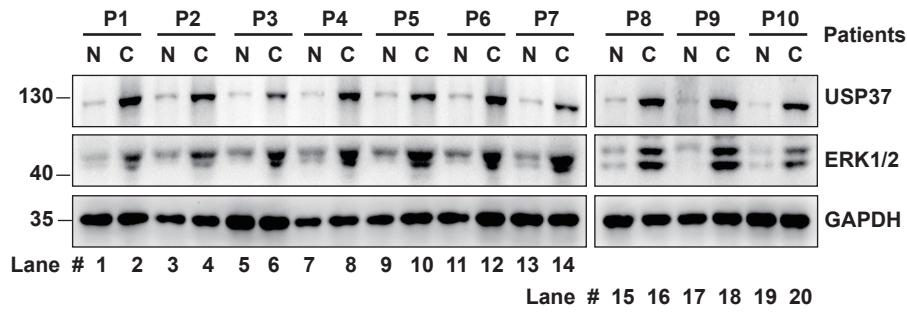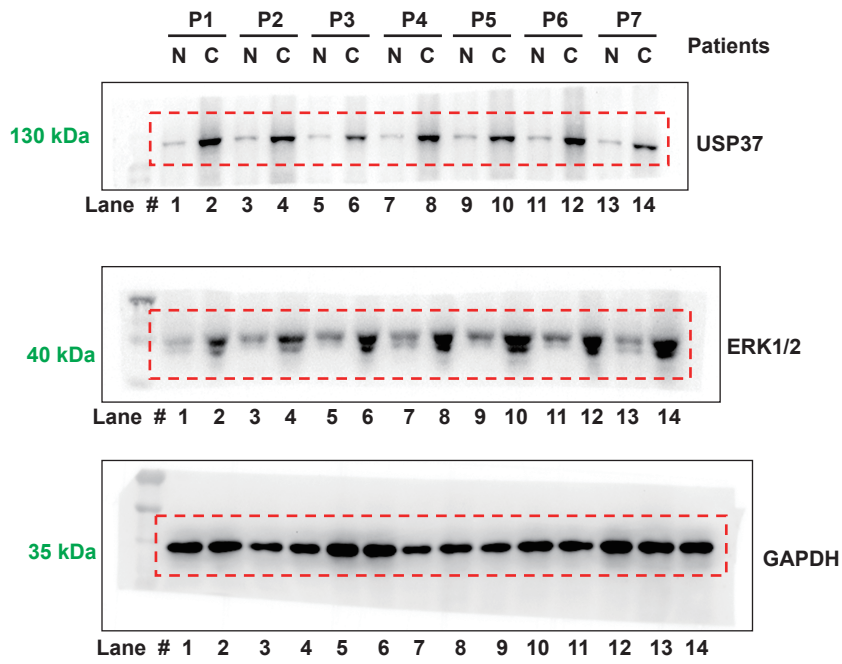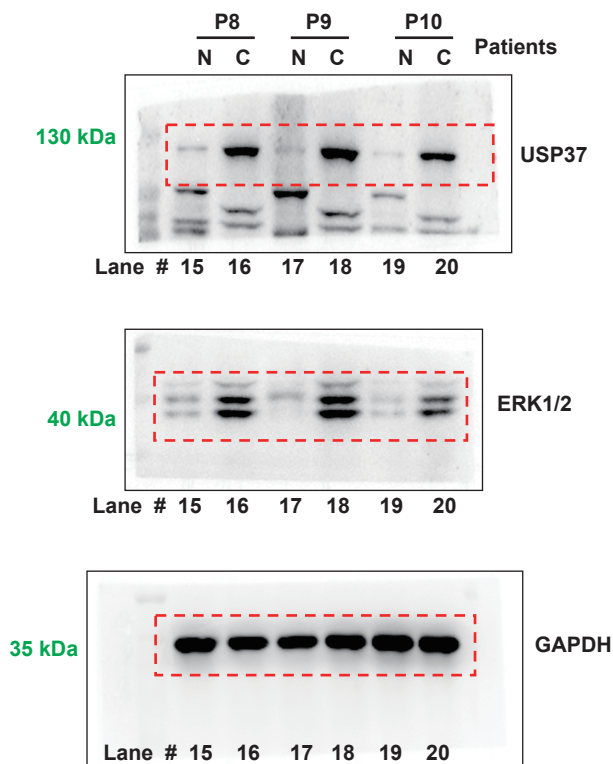

Supplement: JCB_202203005_SourceDataF7.pdf [file JCB_202203005_SourceDataF7.pdf]

Source Data Figure.S2A

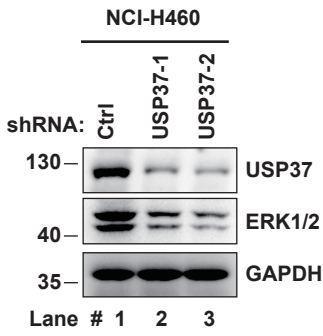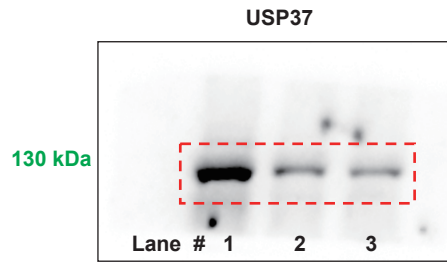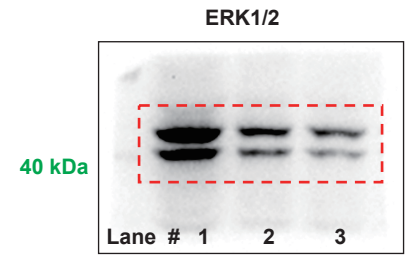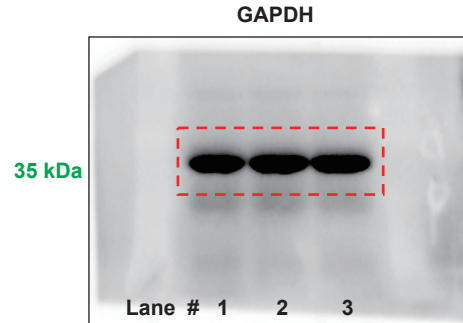

Source Data Figure.S2D

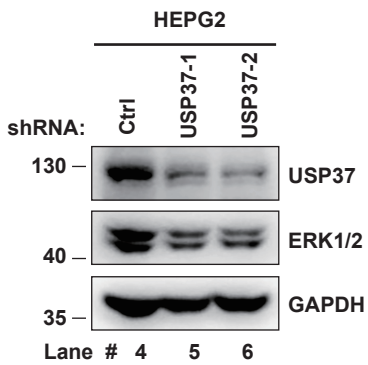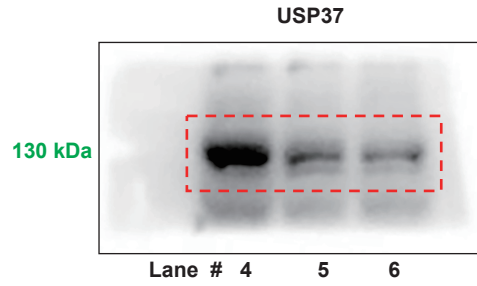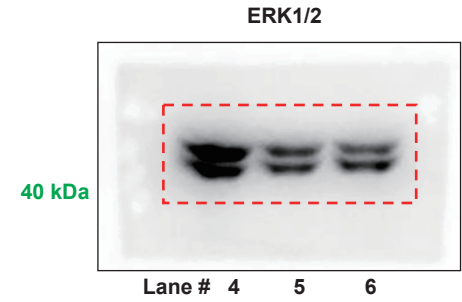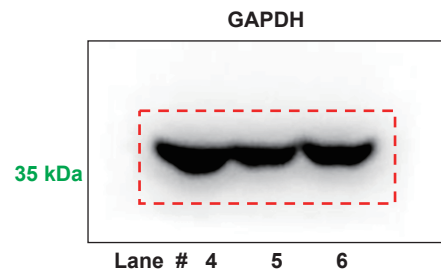

Source Data Figure.S2G

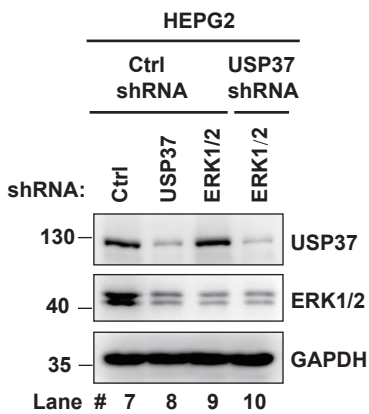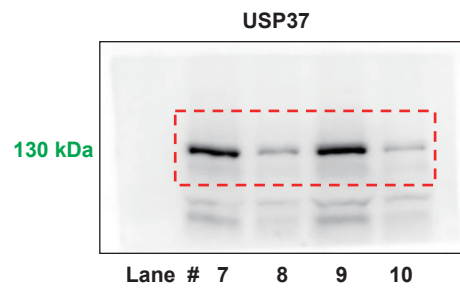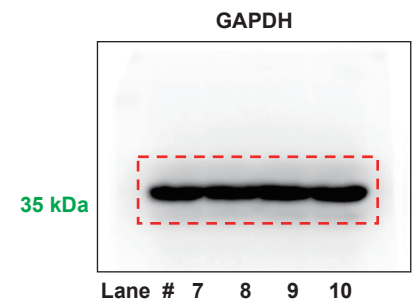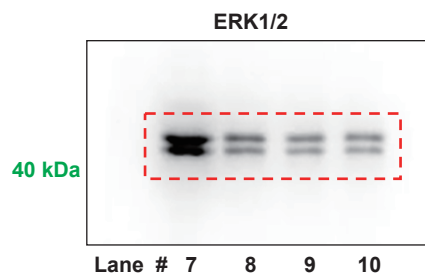

Supplement: JCB_202203005_SourceDataFS2.pdf [file JCB_202203005_SourceDataFS2.pdf]

Source Data Figure.S5C

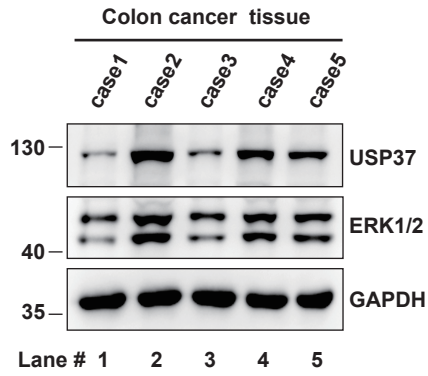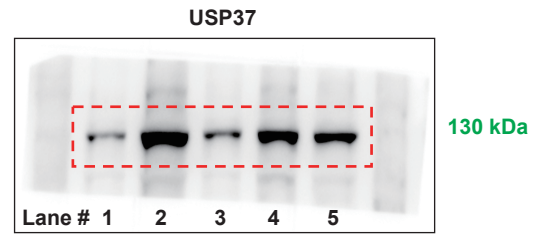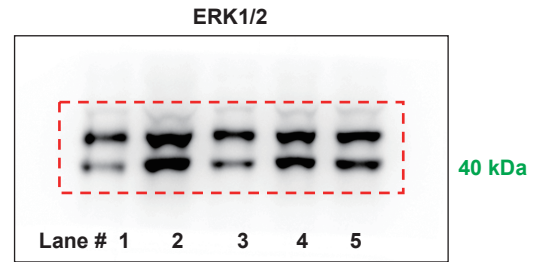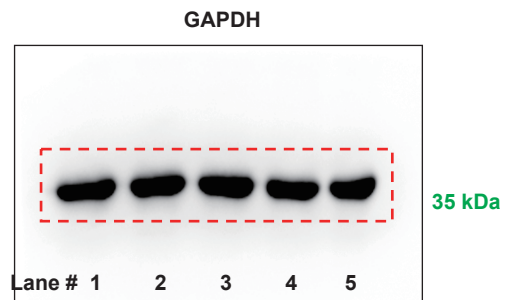

Source Data Figure.S5D

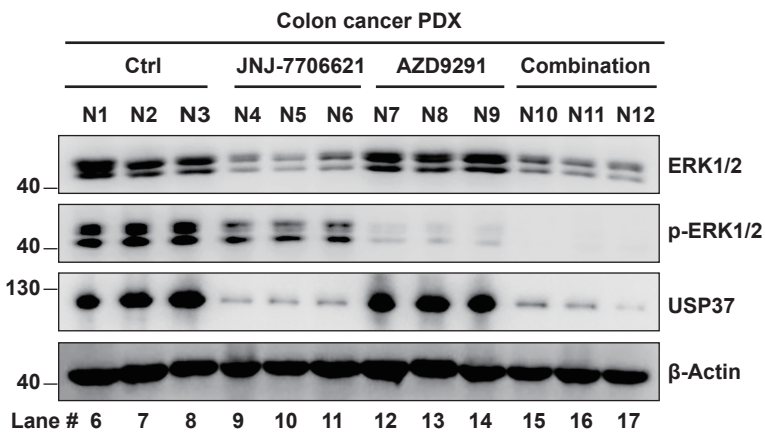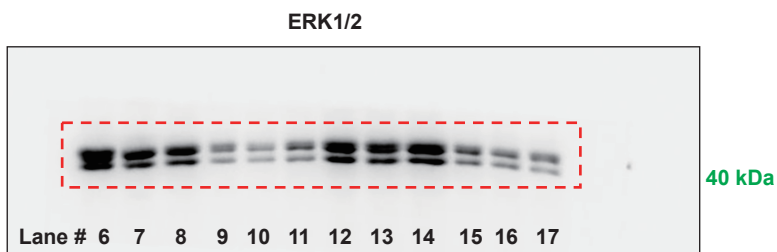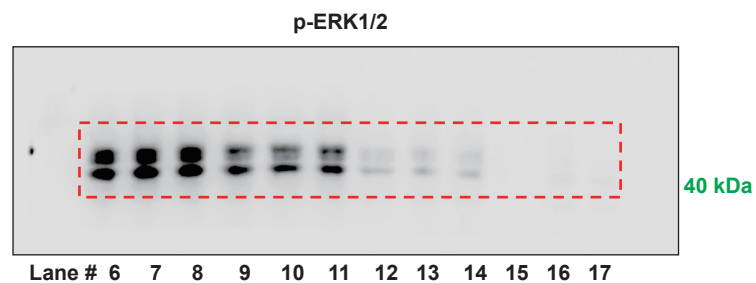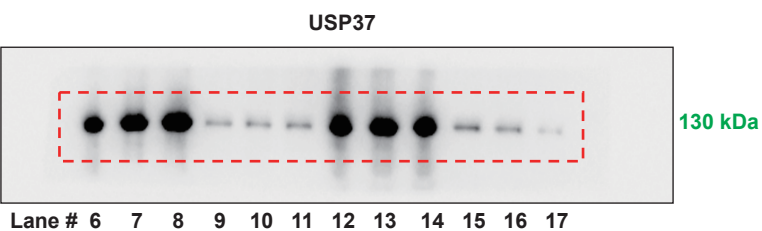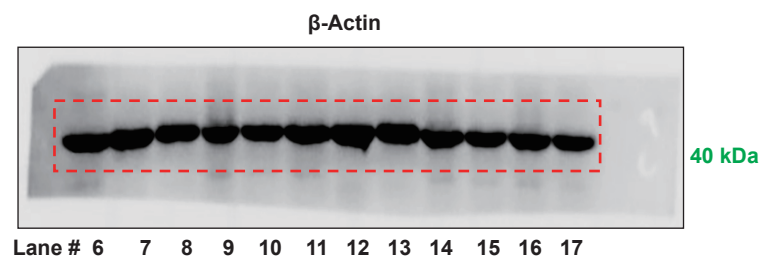

Supplement: JCB_202203005_SourceDataFS5.pdf [file JCB_202203005_SourceDataFS5.pdf]
